# Supplementary material for: Molecular engineering with triptycene groups endows homoleptic Ir(iii) complexes with enhanced electroluminescence properties
Source: Royal Society of Chemistry journal article supplement (doi:10.1039/d2qi01786e), 2022-09-23
Supplement: d2qi01786e1.pdf [file d2qi01786e1.pdf]

## Supporting Information (SI)

### **Molecular engineering by triptycene groups enables homoleptic Ir(III) complexes with enhanced electroluminescent properties**

Zheng-Yu Tao,<sup>†a</sup> Ze-Hui Pan,<sup>†b</sup> Ying-Jie Wang,<sup>†a</sup> Jialing Zhang,<sup>a</sup> Qing-Song Wang,<sup>a</sup> Qian-Feng Zhang,<sup>a</sup> Bi-Hai Tong,<sup>\*a</sup> Man-Keung Fung,<sup>\*b</sup> and Hui Kong<sup>\*a</sup>

<sup>a</sup>Key Laboratory of Metallurgical Emission Reduction & Resources Recycling, Ministry of Education, Institute of Molecular Engineering and Applied Chemistry, School of Metallurgy Engineering, Anhui University of Technology, Maanshan, 243002, Anhui, China. E-mail: tongbihai@ahut.edu.cn, konghui@ahut.edu.cn

<sup>b</sup>Jiangsu Key Laboratory for Carbon-Based Functional Materials & Devices, Institute of Functional Nano & Soft Materials (FUNSOM) & Collaborative Innovation Center of Suzhou Nano Science and Technology, Soochow University, Suzhou 215123, P. R. China. E-mail: mkfung@suda.edu.cn

<sup>†</sup> Authors contributed equally.

#### **Contents:**

1. General descriptions
2. X-ray crystal structure data
3. Photophysical data
4. Reference device data
5. <sup>1</sup>H- and <sup>19</sup>F-NMR spectra and high resolution mass spectrometers (HRMS) of all new compounds
6. References

## 1. General descriptions

### 1.1. Materials and characterization

All the materials and solvents were obtained commercially and used as received without further purification. Proton NMR spectra were measured on a Bruker AV400 spectrometer. High resolution mass spectra (HRMS) were recorded with a TOF 5600<sup>plus</sup> mass spectrometer. X-ray crystallography diffraction was carried out on a Bruker SMART Apex CCD diffractometer. Cyclic voltammetry (CV) was measured on a CHI1140B Electrochemical Analyzer through a three-electrode system with a glassy carbon disk as the working electrode, platinum plate as the counter electrode and Ag/AgCl as the reference electrode. UV/Vis absorption spectra were recorded on a Purkinje General TU-1901 spectrophotometer. The PL spectra were recorded on a PerkinElmer LS-55 fluorescence spectrophotometer. The PL quantum efficiency and lifetime were measured with an Edinburgh FLS980 instrument.

### 1.2. Computational methodology

B3LYP functional was used to optimize the geometrical structures of ground state ( $S_0$ ).<sup>[1]</sup> A “double- $\xi$ ” quality basis set consisting of Hay and Wadt’s effective core potentials (ECP), LANL2DZ,<sup>[2]</sup> was employed to the Ir atom. 6-31G(d) basis set<sup>[3]</sup> was applied to other nonmetallic atoms. The solvent effect in  $\text{CH}_2\text{Cl}_2$  medium was considered throughout the calculations. Combined with VMD program,<sup>[5]</sup> the molecular orbital was visualized by Multiwfn code.<sup>[4]</sup> The frontier molecular orbital (FMO) distribution in molecules was analyzed by Multiwfn using Mulliken population analysis. Gaussian 16 software package was used for calculations.<sup>[6]</sup>

### 1.3. OLED fabrication

The OLEDs were grown on pre-patterned ITO coated glass ( $\approx 20 \Omega \text{ square}^{-1}$ ). Before depositing into the evaporation system, the ITO substrates were cleaned with acetone, ethyl alcohol, and deionized water by ultrasonic cleaning machine for 20 min. All the devices were deposited sequentially under fine vacuum of  $8 \times 10^{-5} \text{ Pa}$ . The organic transport materials were grown by the rate of 0.08-0.15  $\text{nm s}^{-1}$ , while organic dopants,  $\text{AlQ}_3$  were deposited at the rate of 0.02-0.15  $\text{\AA s}^{-1}$ , Al was deposited by the rate of 3  $\text{\AA s}^{-1}$ . The CIE coordinates, luminance, and EL spectra were carried out by a PR655 spectra-scan photometer simultaneously. The current density-voltage

characteristics were tested by a programmable Keithley source-measure 2400 and PR655 spectra-scan.

#### 1.4. Synthetic routes of key intermediates

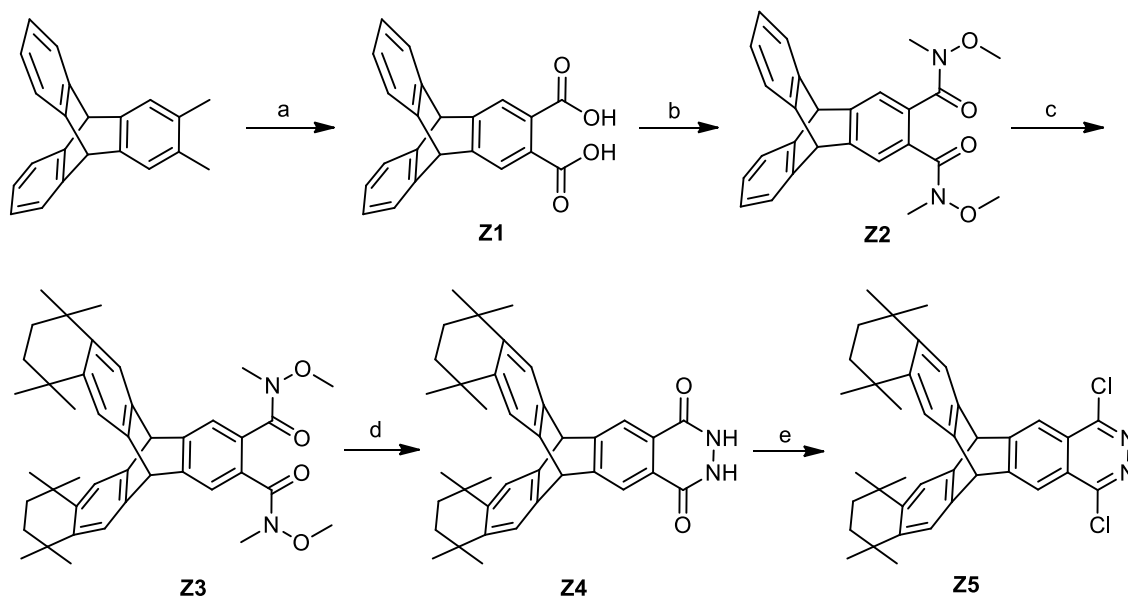

**Scheme S1** Synthetic routes of key intermediates: a)  $\text{KMnO}_4$ , pyridine/ $\text{H}_2\text{O}$ , reflux, 12 h; b)  $\text{NHMe(OMe)}$ ,  $\text{PCl}_3$ ,  $60^\circ\text{C}$ , 1.5 h; c) 2,5-dichloro-2,5-dimethylhexane,  $\text{AlCl}_3$ ,  $\text{CH}_2\text{Cl}_2$ ,  $0^\circ\text{C}$ , 2 h; d) hydrazine hydrate (98%), ethanol, reflux, 12 h; e)  $\text{POCl}_3$ , reflux, 12 h.

#### Triptycene-2,3-dicarboxylic acid (Z1):

$\text{KMnO}_4$  (22.5 g, 140 mmol) was added in batches over 12 h to a refluxing solution of 2,3-dimethyltritycene (2.0 g, 7 mmol, prepared by 2,3-dimethylantracene and anthranilic acid according to the literature method<sup>[1]</sup>) in a mixture of pyridine (20 mL) and  $\text{H}_2\text{O}$  (40 mL). Then, the precipitate was filtered off and washed with 1% aqueous solution of  $\text{NaOH}$ . The filtrate was acidified to pH 1 with dilute hydrochloric acid. The precipitated product was collected by filtration and dried as white powder (2.2 g, 91%).  $^1\text{H NMR}$  (400 MHz,  $\text{DMSO-}d_6$ )  $\delta$  13.10 (br, 2 H), 7.77 (s, 2 H), 7.50 – 7.42 (m, 4 H), 7.06 – 6.98 (m, 4 H), 5.82 (s, 2 H).

#### $\text{N}^2, \text{N}^3$ -Dimethoxy- $\text{N}^2, \text{N}^3$ -dimethyl-triptycene-2,3-dicarboxamide (Z2):

A solution of  $\text{NHMe(OMe)}$  (3.6 g, 60.0 mmol) and triptycene-2,3-dicarboxylic acid (1.0 g, 2.9 mmol) was stirred in dry toluene (20 mL) at  $0^\circ\text{C}$  for 10 min.  $\text{PCl}_3$  (1.2 g, 8.7 mmol) was then added dropwise to the mixture. The mixture was warmed to r.t. slowly and then stirred at  $60^\circ\text{C}$  for 1.5 h. Then the mixture was cooled to r.t. and quenched with saturated  $\text{NaHCO}_3$  aqueous solution and

extracted with EtOAc. The combined organic layers were dried and the solvent was removed in vacuo. The pure product was obtained as white powder (1.3 g, 83%). <sup>1</sup>H NMR (400 MHz, DMSO-*d*<sub>6</sub>) δ 7.57 (s, 2 H), 7.49 – 7.45 (M, 4 H), 7.05 – 7.01 (m, 4 H), 5.78 (s, 2 H), 3.46 (s, 6 H), 3.12 (s, 6 H).

**N<sup>18</sup>,N<sup>19</sup>-Dimethoxy-N<sup>18</sup>,N<sup>19</sup>,1,1,4,4,8,8,11,11-decamethyl-1,2,3,4,6,8,9,10,11,13-decahydro-6,13-[1,2]benzenopentacene-18,19-dicarboxamide (Z3):**

A solution of **Z2** (0.5 g, 1.2 mmol), 2,5-dichloro-2,5-dimethylhexane (0.7 g 3.6 mmol) and AlCl<sub>3</sub> (0.8 g, 6 mmol) in CH<sub>2</sub>Cl<sub>2</sub> (15 mL) was stirred at 0 °C for 2 h. Then the mixture was quenched with H<sub>2</sub>O and extracted with CH<sub>2</sub>Cl<sub>2</sub>. The combined organic layers were washed with ammonia and dried. The solvent was removed in vacuo. The residue was purified by column chromatography on silica gel using petroleum ether/ethyl acetate (V:V=3:2) as the eluent to yield **Z3** (0.45 g, 60%) as a white solid. <sup>1</sup>H NMR (400 MHz, CDCl<sub>3</sub>) δ 7.45 (s, 2 H), 7.27 (s, 4 H), 5.28 (s, 2 H), 3.58 (s, 6 H), 3.25 (s, 6H), 1.61 (s, 8 H), 1.22 (s, 24 H).

**1,1,4,4,8,8,11,11-Octamethyl-1,2,3,4,8,9,10,11,18,19-decahydro-6,13-[6,7]epiphthalazinopentacene-17,20(6H,13H)-dione (Z4):**

A solution of **Z3** (2.0 g, 3 mmol) and hydrazine hydrate (98%, 3 mL) in ethanol (20 mL) was refluxed for 12 h under N<sub>2</sub> atmosphere. Then the solvent was removed in vacuo. The residue was purified by column chromatography on silica gel using petroleum ether/ethyl acetate (V:V=3:2) as the eluent to yield **Z4** (1.5 g, 87%) as a white solid. <sup>1</sup>H NMR (400 MHz, CDCl<sub>3</sub>) δ 8.19 (s, 2 H), 7.34 (s, 4 H), 5.51 (s, 2 H), 1.59 (s, 8 H), 1.24 (s, 24 H).

**17,20-Dichloro-1,1,4,4,8,8,11,11-octamethyl-1,2,3,4,6,8,9,10,11,13-decahydro-6,13-[6,7]epiphthalazinopentacene (Z5):**

A solution of **Z4** (0.85 g, 2.5 mmol) in POCl<sub>3</sub> (7 mL) was refluxed for 12 h under N<sub>2</sub> atmosphere. The mixture was cooled to r.t. and poured into ice water. The mixture was adjusted to weakly alkaline with NaHCO<sub>3</sub> and extracted with CH<sub>2</sub>Cl<sub>2</sub>. The combined organic layers were washed with ammonia and dried. The residue was purified by flash column chromatography on silica gel using CH<sub>2</sub>Cl<sub>2</sub> as the eluent to yield **Z5** (0.55 g, 61%) as a white solid. Because this product was sensitive to water, it was not further purified and the next reaction was directly carried out.

## 2. X-ray crystal structure data

**Table S1** Crystallographic refinement data of complexes **Ir1**, **Ir2** and **Ir3**.

| Compound                           | <b>Ir1</b>                                                                                         | <b>Ir2</b>                                                                     | <b>Ir3</b>                                                                           |
|------------------------------------|----------------------------------------------------------------------------------------------------|--------------------------------------------------------------------------------|--------------------------------------------------------------------------------------|
| Empirical formula                  | C <sub>6</sub> H <sub>51</sub> F <sub>18</sub> IrN <sub>6</sub>                                    | C <sub>108</sub> H <sub>57</sub> F <sub>18</sub> IrN <sub>6</sub>              | C <sub>108</sub> H <sub>57</sub> F <sub>18</sub> IrN <sub>6</sub>                    |
| Formula weight                     | 1822.62                                                                                            | 1972.79                                                                        | 1972.79                                                                              |
| Temperature                        | 296(2) K                                                                                           | 296(2) K                                                                       | 296(2) K                                                                             |
| Wavelength                         | 0.71073 Å                                                                                          | 0.71073 Å                                                                      | 0.71073 Å                                                                            |
| Crystal system                     | Triclinic                                                                                          | Trigonal                                                                       | Monoclinic                                                                           |
| Space group                        | <i>P</i> -1                                                                                        | R-3                                                                            | P2 <sub>1</sub> /c                                                                   |
| Unit cell dimensions               | a = 15.821(6) Å α = 73.051(5)°<br>b = 16.604(7) Å β = 79.335(5)°<br>c = 16.741(7) Å γ = 78.608(5)° | a = 23.222(6) Å α = 90°<br>b = 23.222(6) Å β = 90°<br>c = 36.092(9) Å γ = 120° | a = 15.492(4) Å α = 90°<br>b = 23.882(6) Å β = 94.240(5)°<br>c = 27.611(7) Å γ = 90° |
| Volume                             | 4085.5(3) Å <sup>3</sup>                                                                           | 16856(9) Å <sup>3</sup>                                                        | 10188(4) Å <sup>3</sup>                                                              |
| Z                                  | 2                                                                                                  | 6                                                                              | 4                                                                                    |
| Density (calculated)               | 1.482 Mg/m <sup>3</sup>                                                                            | 1.166 Mg/m <sup>3</sup>                                                        | 1.286 Mg/m <sup>3</sup>                                                              |
| Absorption coefficient             | 1.727 mm <sup>-1</sup>                                                                             | 1.261 mm <sup>-1</sup>                                                         | 1.391 mm <sup>-1</sup>                                                               |
| F(000)                             | 1816                                                                                               | 5916                                                                           | 3944                                                                                 |
| Crystal size                       | 0.22 x 0.2 x 0.18 mm <sup>3</sup>                                                                  | 0.260 x 0.240 x 0.200 mm <sup>3</sup>                                          | 0.250 x 0.200 x 0.180 mm <sup>3</sup>                                                |
| Theta range for data collection    | 2.279 to 24.999°                                                                                   | 2.102 to 24.996°                                                               | 2.053 to 25.000°                                                                     |
| Index ranges                       | -18<=h<=18,<br>-16<=l<=19                                                                          | -18<=k<=19,<br>-37<=l<=42                                                      | -27<=h<=27,<br>-18<=h<=18,<br>-28<=k<=20,<br>-32<=l<=32                              |
| Reflections collected              | 20932                                                                                              | 29068                                                                          | 53030                                                                                |
| Independent reflections            | 14062 [R(int) = 0.0382]                                                                            | 6586 [R(int) = 0.0314]                                                         | 17865 [R(int) = 0.1454]                                                              |
| Completeness to theta =<br>25.000° | 97.7 %                                                                                             | 99.7 %                                                                         | 99.5 %                                                                               |
| Absorption correction              | Semi-empirical from equivalents                                                                    | Semi-empirical from equivalents                                                | Semi-empirical from equivalents                                                      |
| Max. and min. transmission         | 0.746 and 0.702                                                                                    | 0.787 and 0.735                                                                | 0.788 and 0.722                                                                      |
| Refinement method                  | Full-matrix least-squares on F <sup>2</sup>                                                        | Full-matrix least-squares on F <sup>2</sup>                                    | Full-matrix least-squares on F <sup>2</sup>                                          |
| Data / restraints / parameters     | 14062 / 1234 / 1090                                                                                | 6586 / 480 / 400                                                               | 17865 / 1392 / 1198                                                                  |
| Goodness-of-fit on F <sup>2</sup>  | 0.947                                                                                              | 0.894                                                                          | 0.940                                                                                |
| Final R indices [I>2sigma(I)]      | R1 = 0.0488, wR2 = 0.1296                                                                          | R1 = 0.0339, wR2 = 0.0966                                                      | R1 = 0.0641, wR2 = 0.1078                                                            |
| R indices (all data)               | R1 = 0.0770, wR2 = 0.1458                                                                          | R1 = 0.0404, wR2 = 0.1007                                                      | R1 = 0.1454, wR2 = 0.1281                                                            |
| Extinction coefficient             | n/a                                                                                                | n/a                                                                            | n/a                                                                                  |
| Largest diff. peak and hole        | 1.627 and -1.200 e.Å <sup>-3</sup>                                                                 | 0.968 and -0.626 e.Å <sup>-3</sup>                                             | 1.300 and -0.991 e.Å <sup>-3</sup>                                                   |

**Table S2** Selected bond lengths [Å] and angles [°] for complexes **Ir1**, **Ir2** and **Ir3**.

| <b>Ir1</b>        |            | <b>Ir2</b>           |            | <b>Ir3</b>          |          |
|-------------------|------------|----------------------|------------|---------------------|----------|
| Ir(1)-C(2)        | 2.016(5)   | Ir(01)-C(5)#1        | 2.017(3)   | Ir(01)-C(2)         | 2.001(6) |
| Ir(1)-C(81)       | 2.016(6)   | Ir(01)-C(5)#2        | 2.017(3)   | Ir(01)-C(68)        | 2.004(7) |
| Ir(1)-C(33)       | 2.038(6)   | Ir(01)-C(5)          | 2.017(3)   | Ir(01)-C(102)       | 2.026(7) |
| Ir(1)-N(5)        | 2.101(5)   | Ir(01)-N(2)#1        | 2.089(2)   | Ir(01)-N(5)         | 2.077(5) |
| Ir(1)-N(1)        | 2.112(5)   | Ir(01)-N(2)#2        | 2.089(2)   | Ir(01)-N(3)         | 2.091(6) |
| Ir(1)-N(3)        | 2.113(5)   | Ir(01)-N(2)          | 2.089(2)   | Ir(01)-N(1)         | 2.102(5) |
| C(2)-Ir(1)-C(81)  | 92.4(2)    | C(5)#1-Ir(01)-C(5)#2 | 96.99(10)  | C(2)-Ir(01)-C(68)   | 96.4(3)  |
| C(2)-Ir(1)-C(33)  | 96.3(2)    | C(5)#1-Ir(01)-C(5)   | 96.98(10)  | C(2)-Ir(01)-C(102)  | 96.9(3)  |
| C(81)-Ir(1)-C(33) | 98.6(2)    | C(5)#2-Ir(01)-C(5)   | 96.98(10)  | C(68)-Ir(01)-C(102) | 93.7(3)  |
| C(2)-Ir(1)-N(5)   | 90.3(2)    | C(5)#1-Ir(01)-N(2)#1 | 78.27(11)  | C(2)-Ir(01)-N(5)    | 79.2(3)  |
| C(81)-Ir(1)-N(5)  | 79.2(2)    | C(5)#2-Ir(01)-N(2)#1 | 91.19(10)  | C(68)-Ir(01)-N(5)   | 169.7(3) |
| C(33)-Ir(1)-N(5)  | 173.17(19) | C(5)-Ir(01)-N(2)#1   | 171.02(10) | C(102)-Ir(01)-N(5)  | 96.1(2)  |
| C(2)-Ir(1)-N(1)   | 78.9(2)    | C(5)#1-Ir(01)-N(2)#2 | 171.02(10) | C(2)-Ir(01)-N(3)    | 93.9(3)  |
| C(81)-Ir(1)-N(1)  | 168.99(19) | C(5)#2-Ir(01)-N(2)#2 | 78.26(11)  | C(68)-Ir(01)-N(3)   | 78.9(3)  |
| C(33)-Ir(1)-N(1)  | 89.1(2)    | C(5)-Ir(01)-N(2)#2   | 91.19(10)  | C(102)-Ir(01)-N(3)  | 167.5(3) |
| N(5)-Ir(1)-N(1)   | 93.94(18)  | N(2)#1-Ir(01)-N(2)#2 | 94.11(9)   | N(5)-Ir(01)-N(3)    | 92.0(2)  |
| C(2)-Ir(1)-N(3)   | 175.22(19) | C(5)#1-Ir(01)-N(2)   | 91.19(10)  | C(2)-Ir(01)-N(1)    | 168.9(2) |
| C(81)-Ir(1)-N(3)  | 89.3(2)    | C(5)#2-Ir(01)-N(2)   | 171.02(10) | C(68)-Ir(01)-N(1)   | 94.2(2)  |
| C(33)-Ir(1)-N(3)  | 79.0(2)    | C(5)-Ir(01)-N(2)     | 78.26(11)  | C(102)-Ir(01)-N(1)  | 79.1(3)  |
| N(5)-Ir(1)-N(3)   | 94.44(18)  | N(2)#1-Ir(01)-N(2)   | 94.11(9)   | N(5)-Ir(01)-N(1)    | 90.9(2)  |
| N(1)-Ir(1)-N(3)   | 99.92(18)  | N(2)#2-Ir(01)-N(2)   | 94.11(9)   | N(3)-Ir(01)-N(1)    | 91.4(2)  |

### 3. Photophysical data

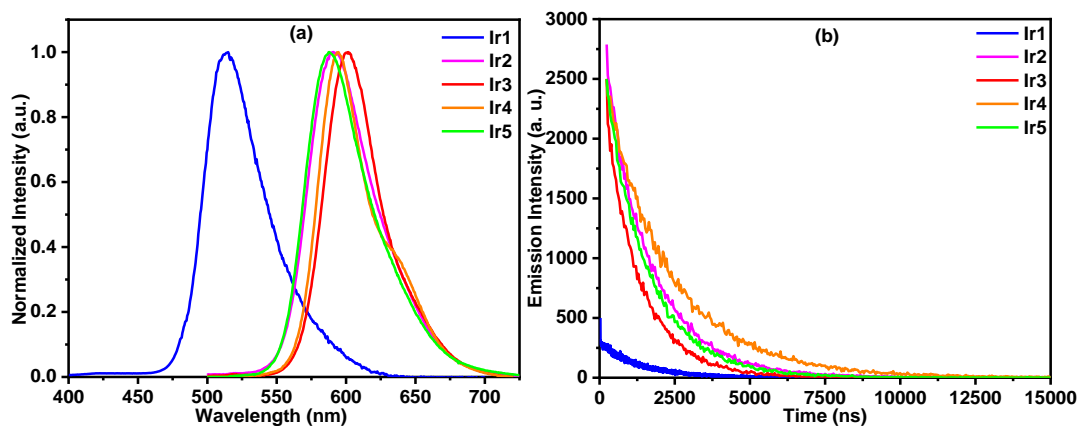

Fig. S1 PL spectra of new iridium complex in PMMA films at a conc. of 1 wt% (a) and the emission decay curves (b) at RT.

### 4. Reference device data

The doping concentration of the reference emitter **PO-01** was 10 wt%, corresponding to reference device C.

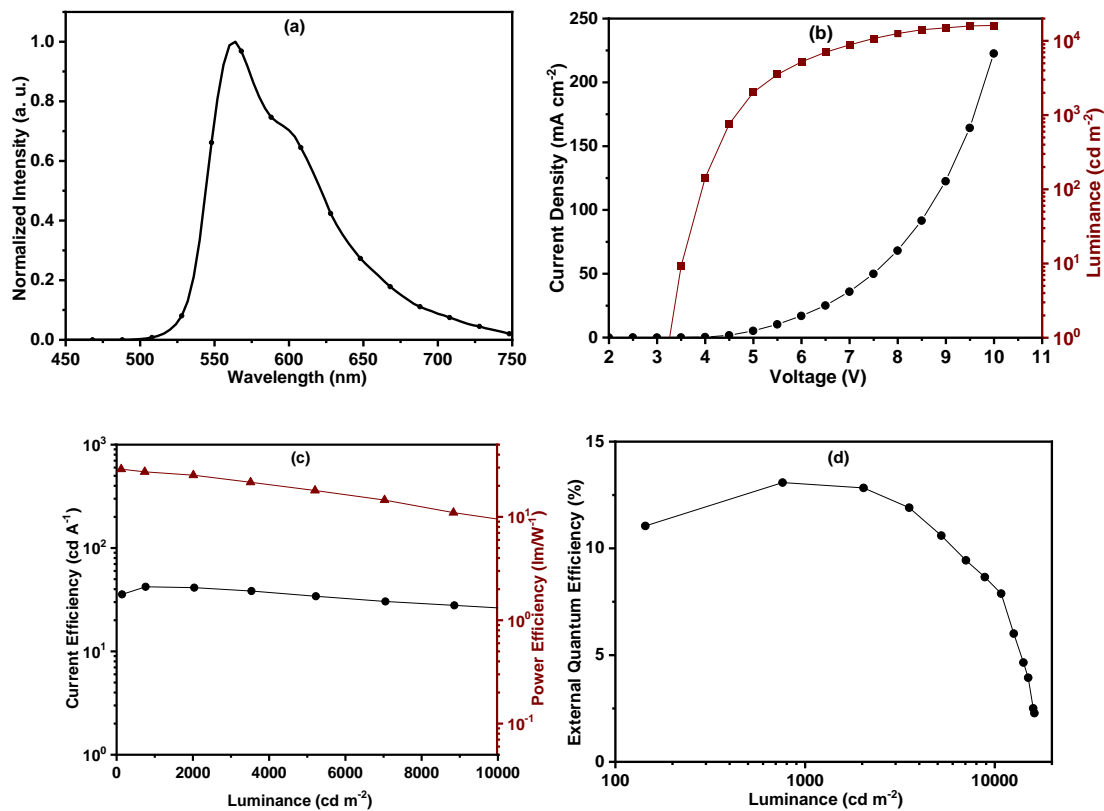

Fig. S2 (a) Electroluminescence spectrum of the reference device. (b) The luminance-voltage characteristic of reference device. (c) The current efficiency-luminance-power efficiency characteristic of reference device. (d) The EQE characteristic of reference device.

**Table S3** Summary of reference device luminescence and efficiency data.

| Device<br>(dopant) | $\lambda_{EL}^a$<br>(nm) | $V_{on}^b$<br>(V) | $L^c$<br>(cd m <sup>-2</sup> ) | $CE^d$<br>(cd A <sup>-1</sup> ) | $PE^d$<br>(lm W <sup>-1</sup> ) | $EQE^d$<br>(%) | $CIE^a$<br>(x, y) |
|--------------------|--------------------------|-------------------|--------------------------------|---------------------------------|---------------------------------|----------------|-------------------|
| C (PO-01)          | 564                      | 3.2               | 16170                          | 42.1 (42.0)                     | 29.0 (26.9)                     | 13.1 (13.0)    | (0.50,0.49)       |

(a) Values at 7 V; (b) Turn on voltages at 1 cd m<sup>-2</sup>; (c) Maximum luminance; (d) Maximum efficiency (efficiency at 1000 cd m<sup>-2</sup>).

**Table S4** Concentration optimization experimental device luminescence and efficiency data.

| Sample<br>(concentration) | $\lambda_{EL}^a$<br>(nm) | $V_{on}^b$<br>(V) | $L^c$<br>(cd m <sup>-2</sup> ) | $CE^d$<br>(cd A <sup>-1</sup> ) | $PE^d$<br>(lm W <sup>-1</sup> ) | $EQE^d$<br>(%) |
|---------------------------|--------------------------|-------------------|--------------------------------|---------------------------------|---------------------------------|----------------|
| Ir1 (10 wt%)              | 524                      | 3.2               | 18410                          | 46.3                            | 45.5                            | 15.8           |
| Ir1 (15 wt%)              | 526                      | 3.1               | 24510                          | 48.5                            | 47.6                            | 17.1           |
| Ir1 (20 wt%)              | 526                      | 3.2               | 22190                          | 44.1                            | 43.3                            | 14.9           |
| Ir2 (2 wt%)               | 588                      | 3.8               | 15190                          | 46.4                            | 38.3                            | 27.3           |
| Ir2 (3 wt%)               | 592                      | 4.0               | 19067                          | 46.4                            | 35.64                           | 27.5           |
| Ir2 (4 wt%)               | 592                      | 3.8               | 19870                          | 44.6                            | 35.18                           | 26.5           |
| Ir2 (5 wt%)               | 596                      | 3.8               | 15251                          | 40.1                            | 28.5                            | 23.8           |

(a) Values at 6 V; (b) Turn on voltages at 1 cd m<sup>-2</sup>; (c) Maximum luminance; (d) Maximum efficiency.

## 5. <sup>1</sup>H- and <sup>19</sup>F-NMR spectra and high resolution mass spectrometers (HRMS) of all new compounds

Z1:

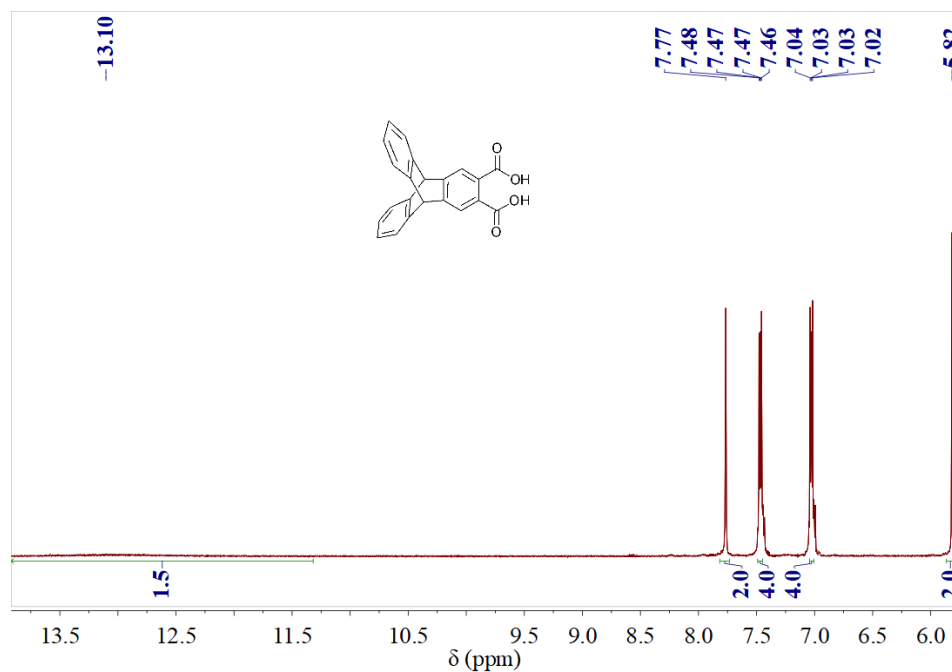



**Z2:**

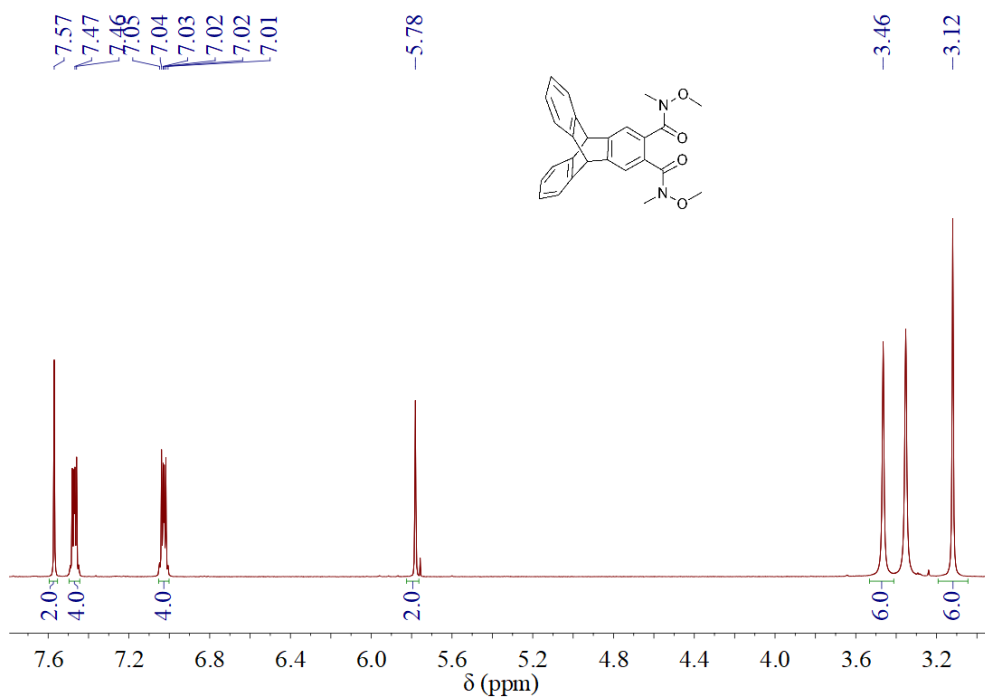

**Z3:**

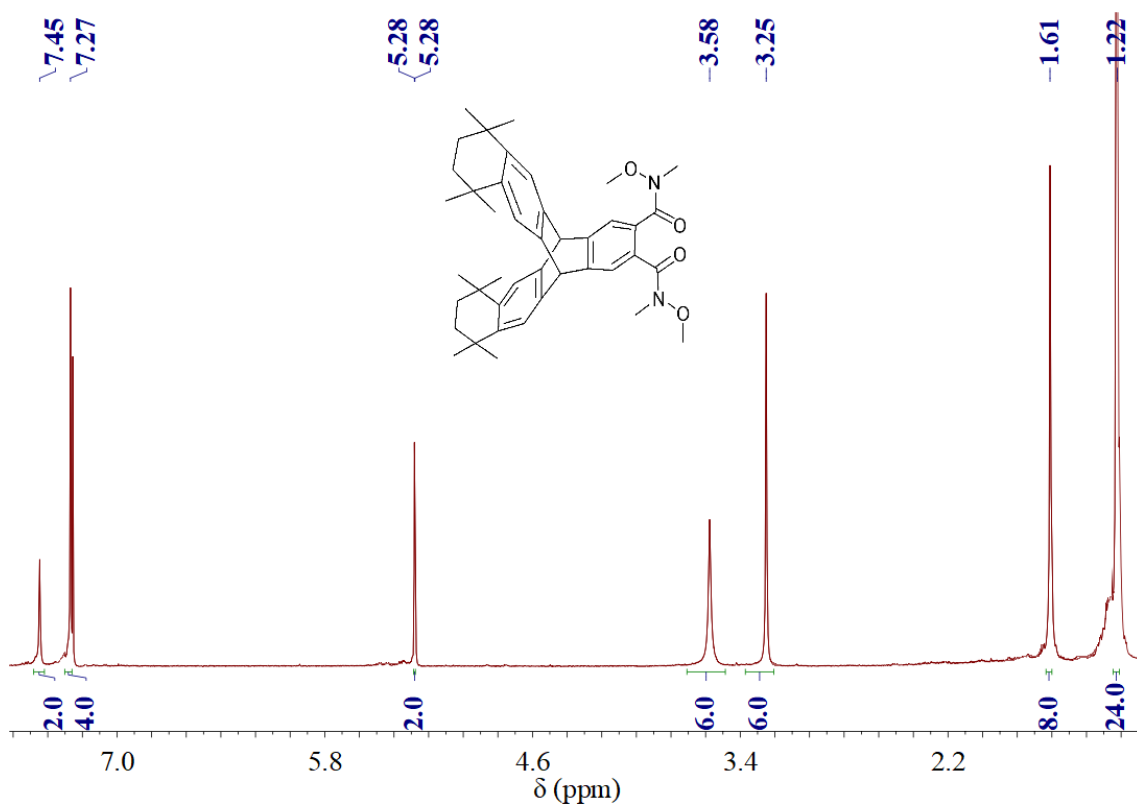

Z4:

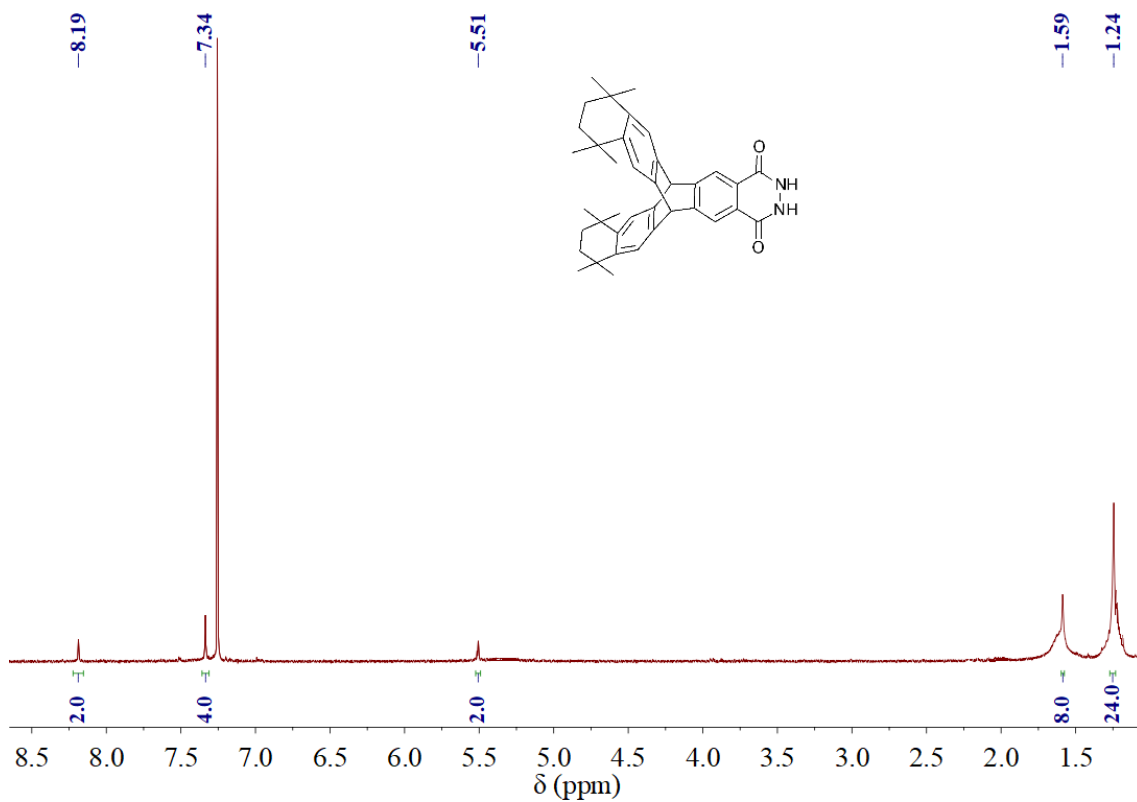

L1:

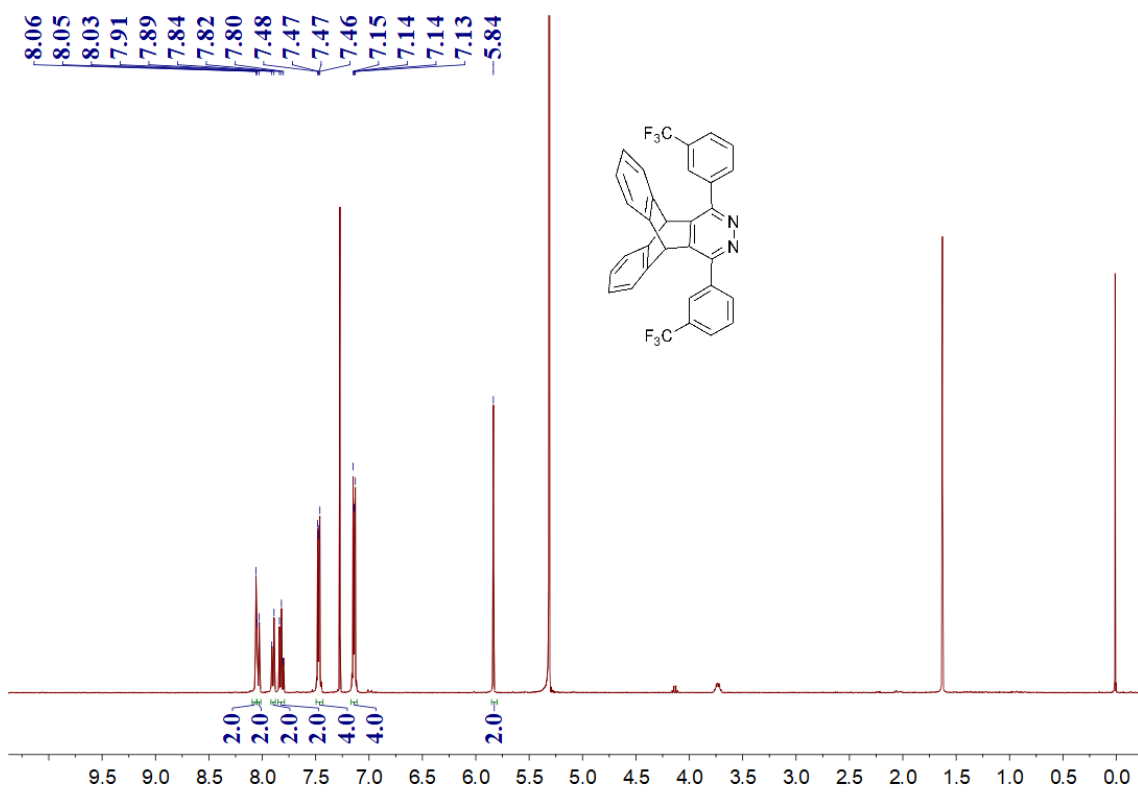

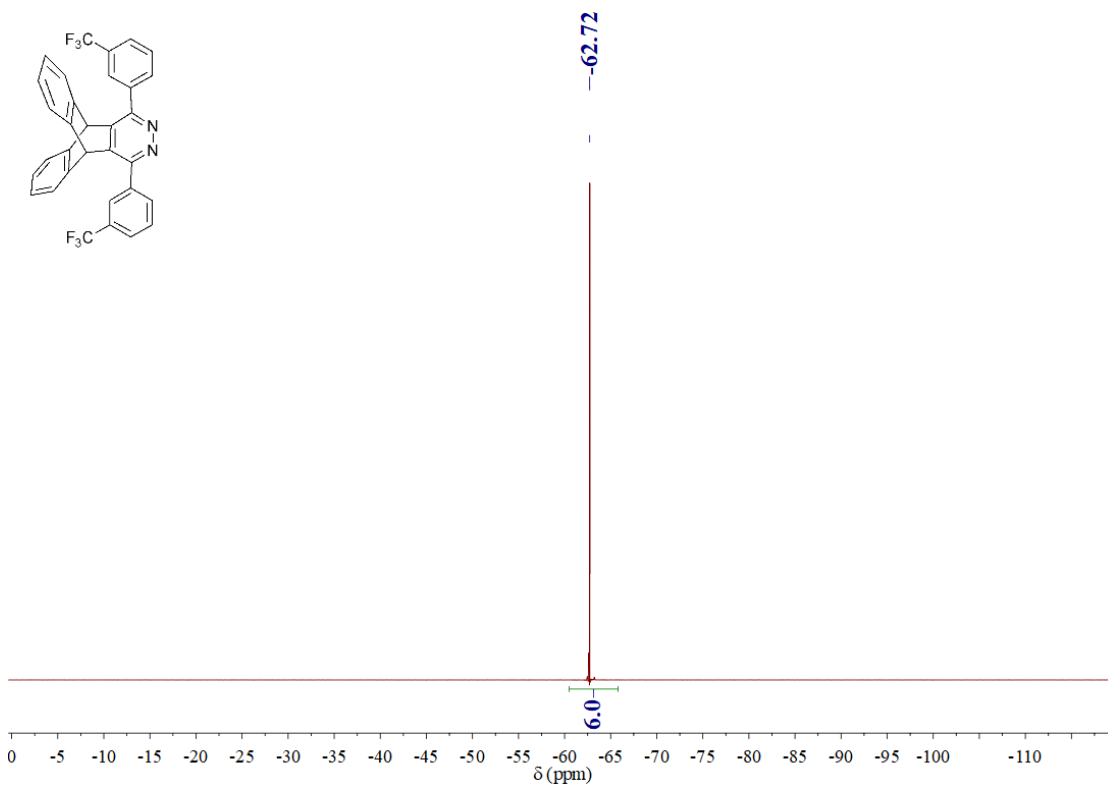

Spectrum from c4ddp.wiff (sample 1) - Sample002, Experiment 1, +TOF MS (100 - 2000) from 0.160 min

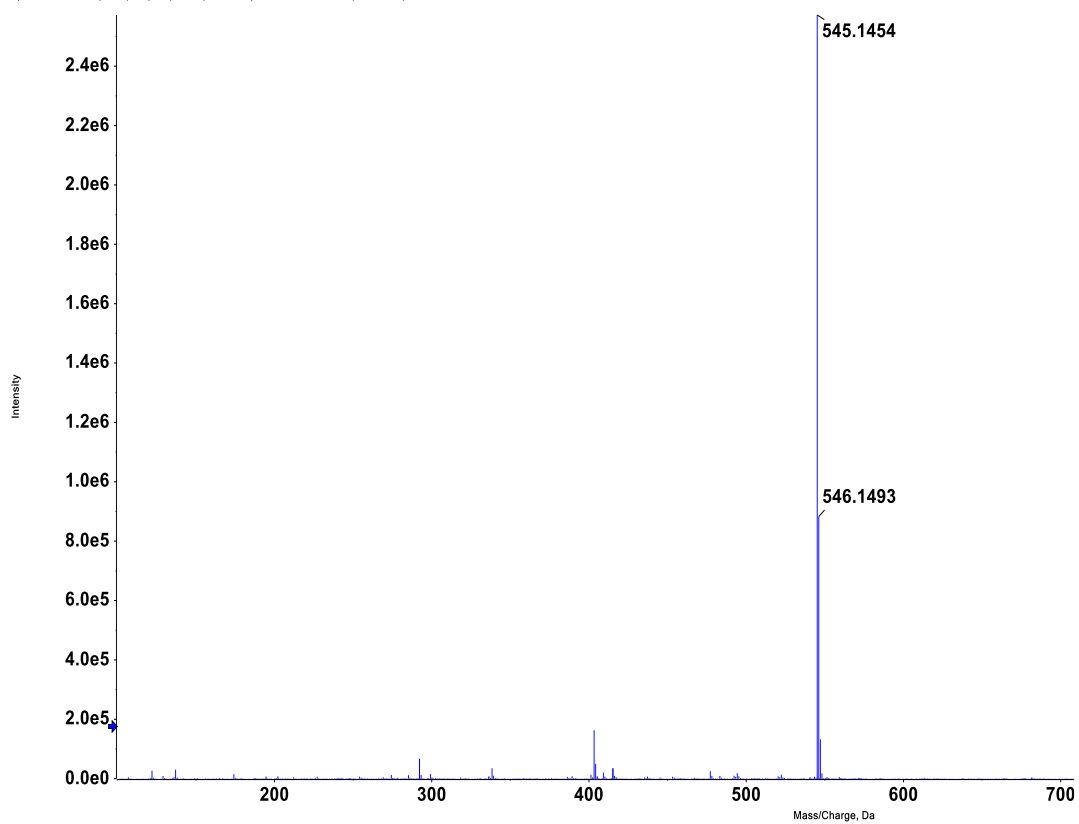

L2:

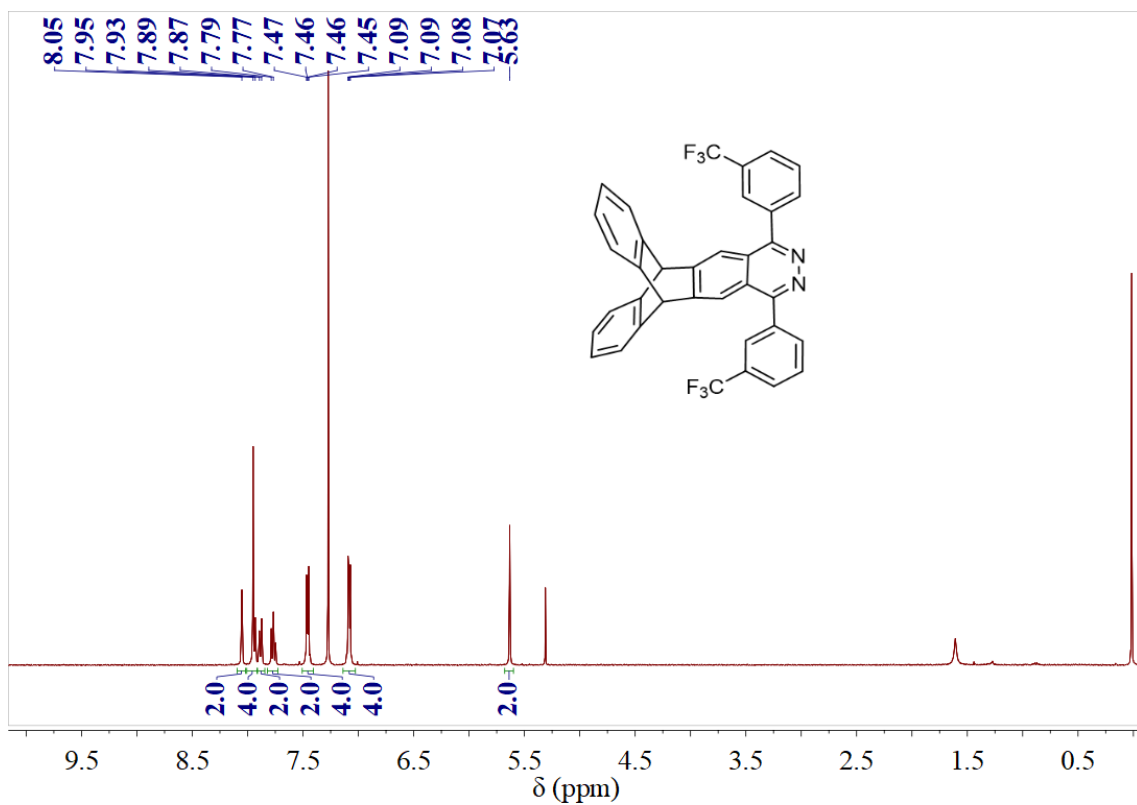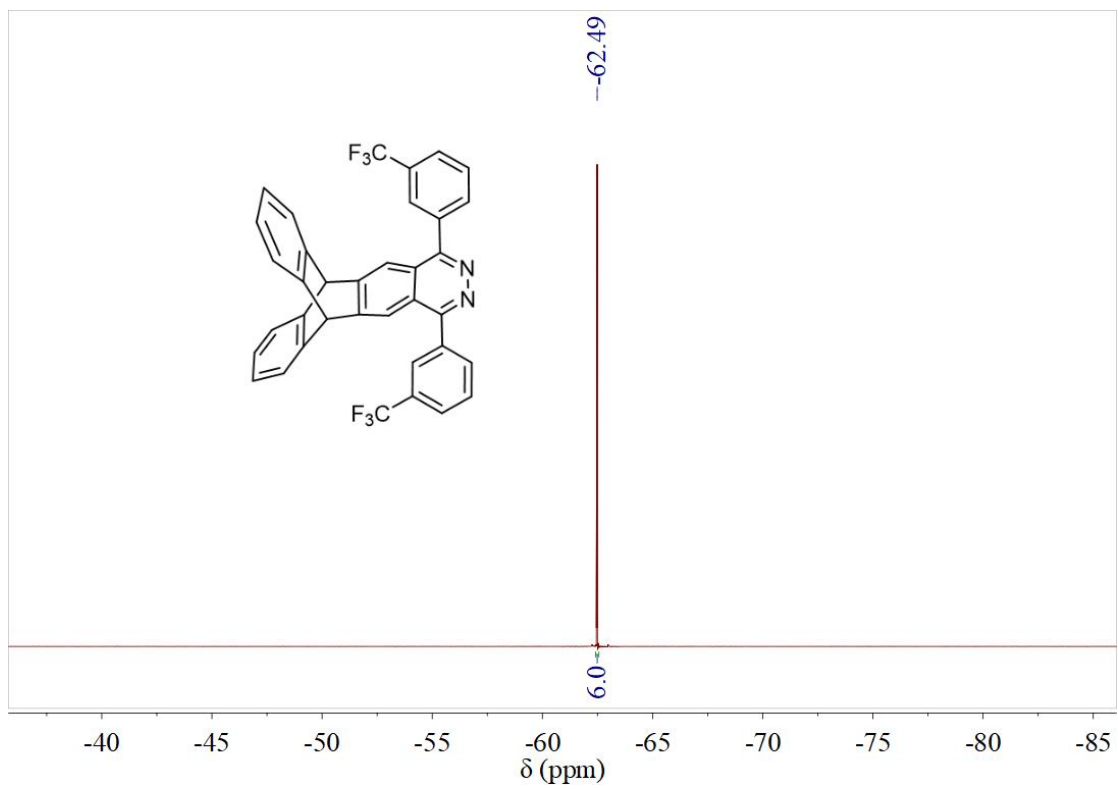

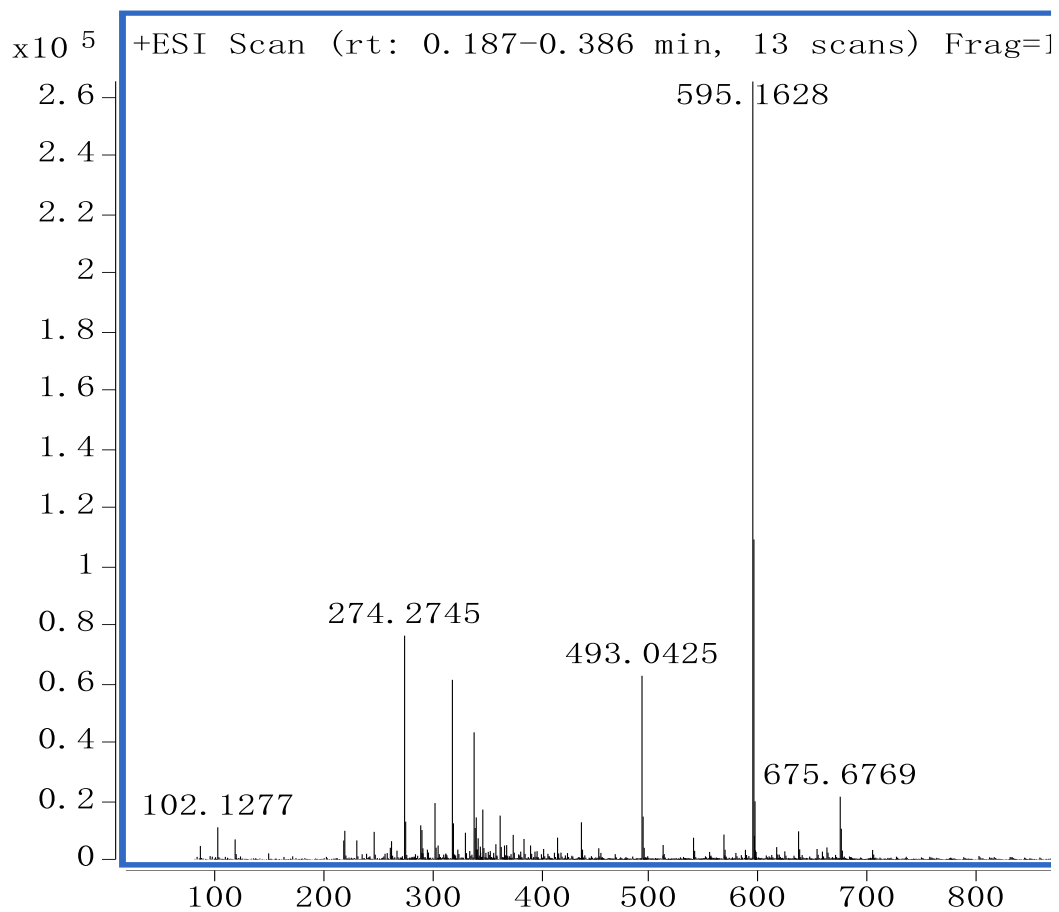

L3:

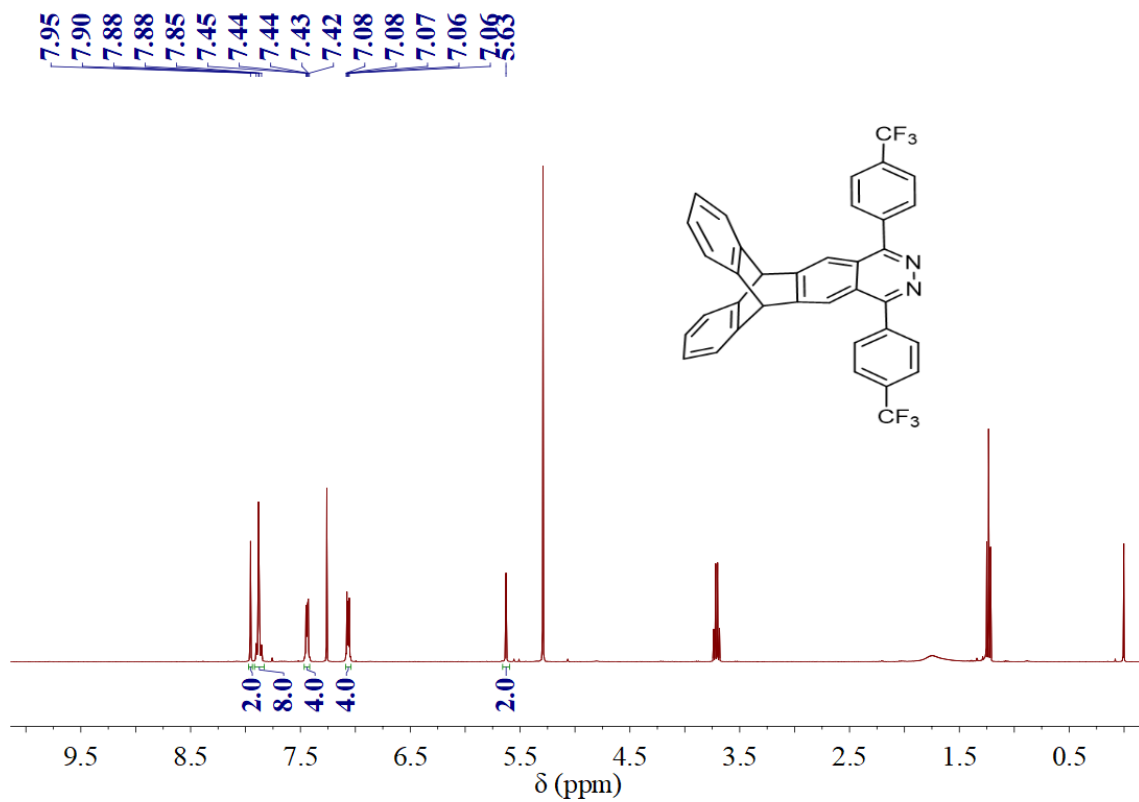

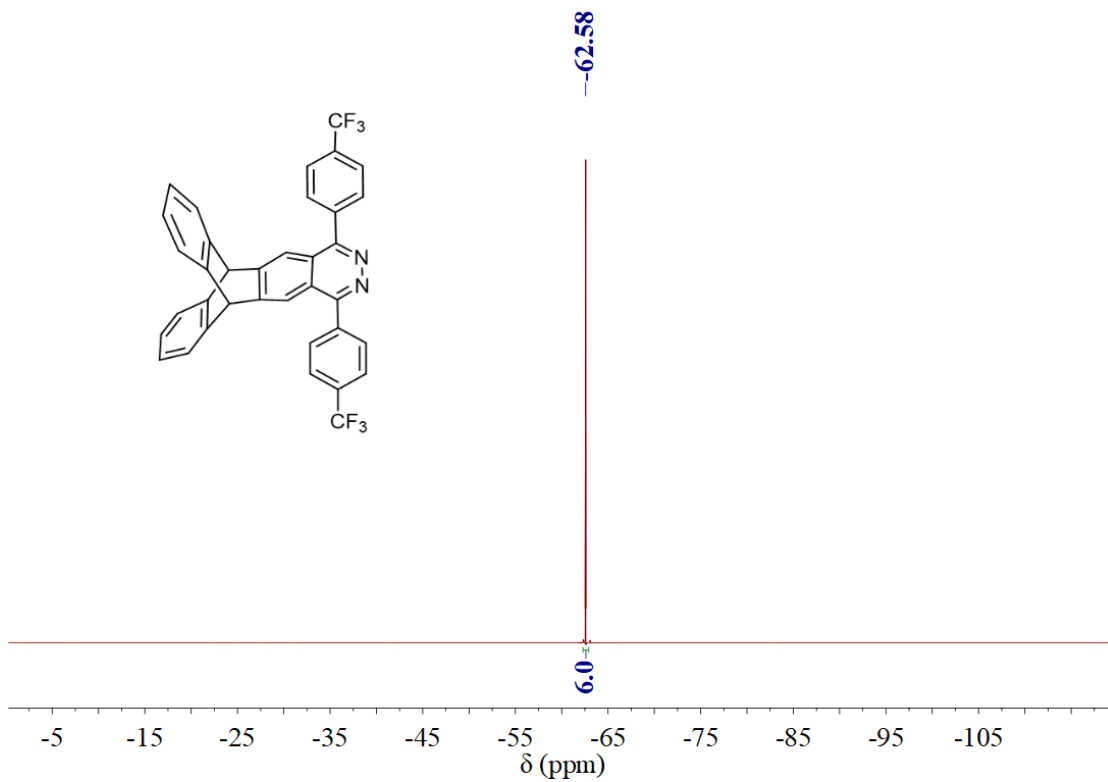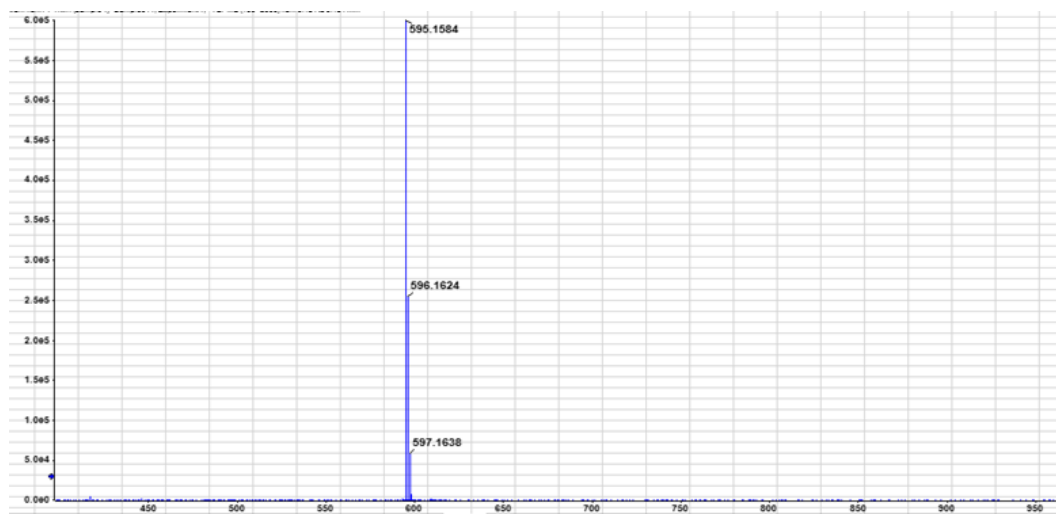

L4:

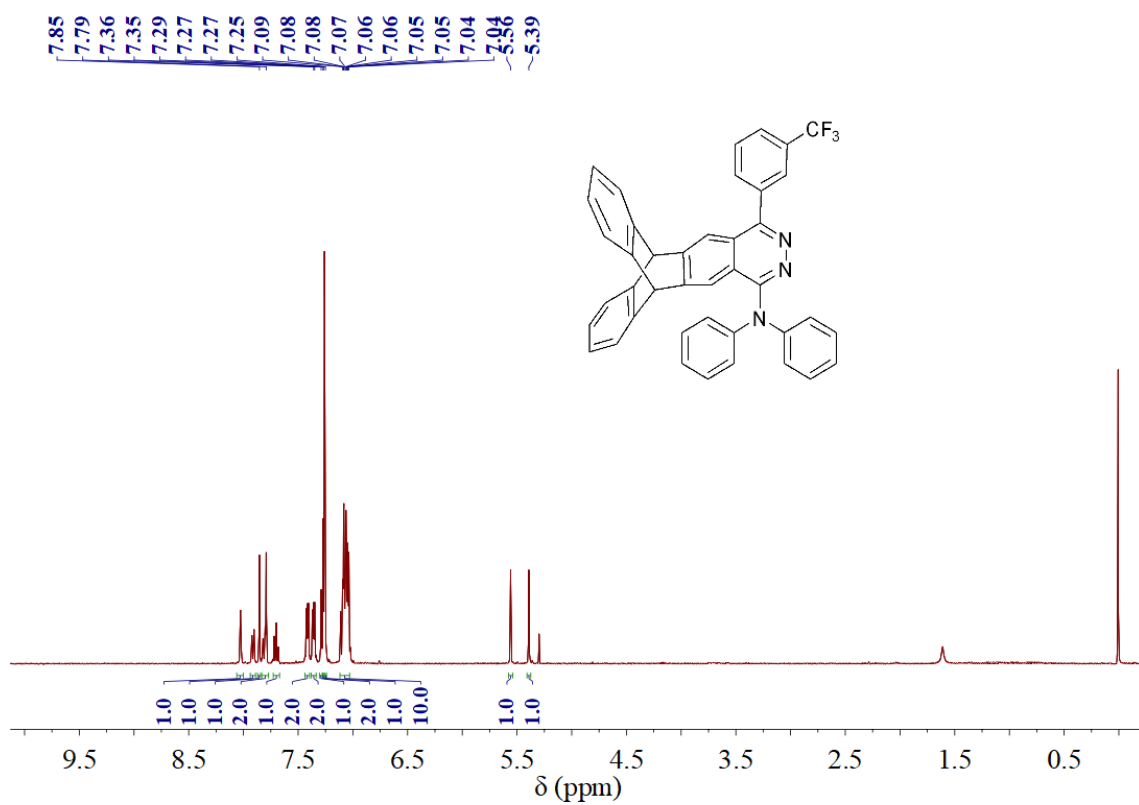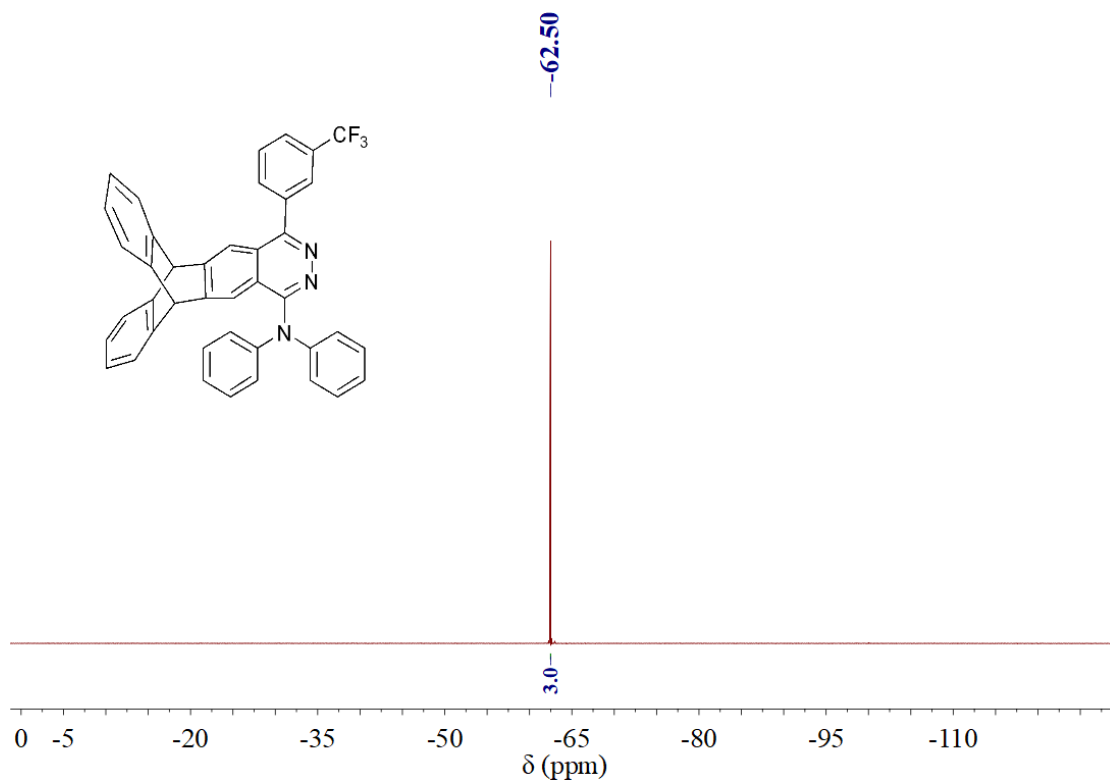

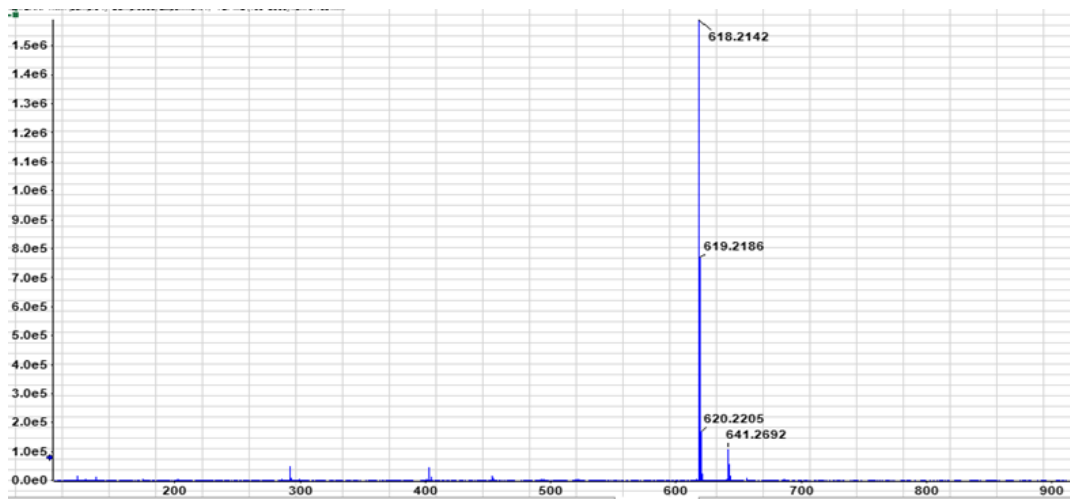

L5:

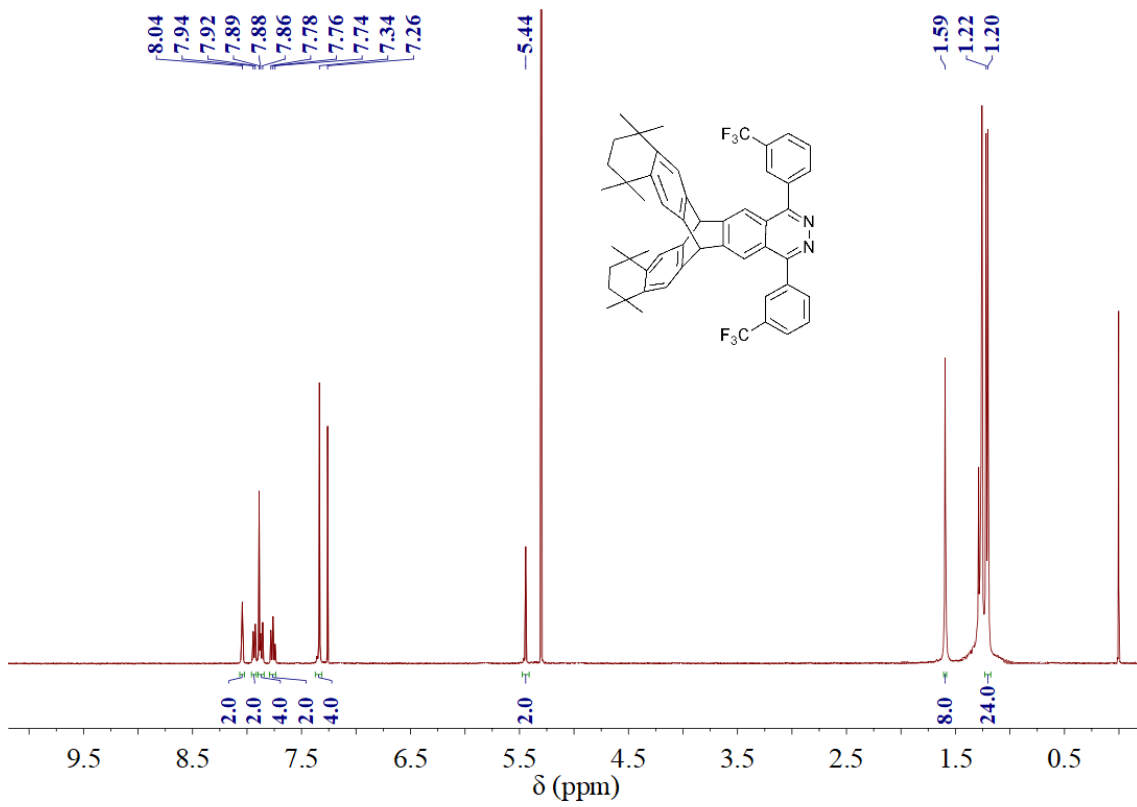



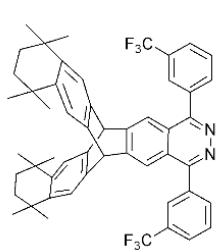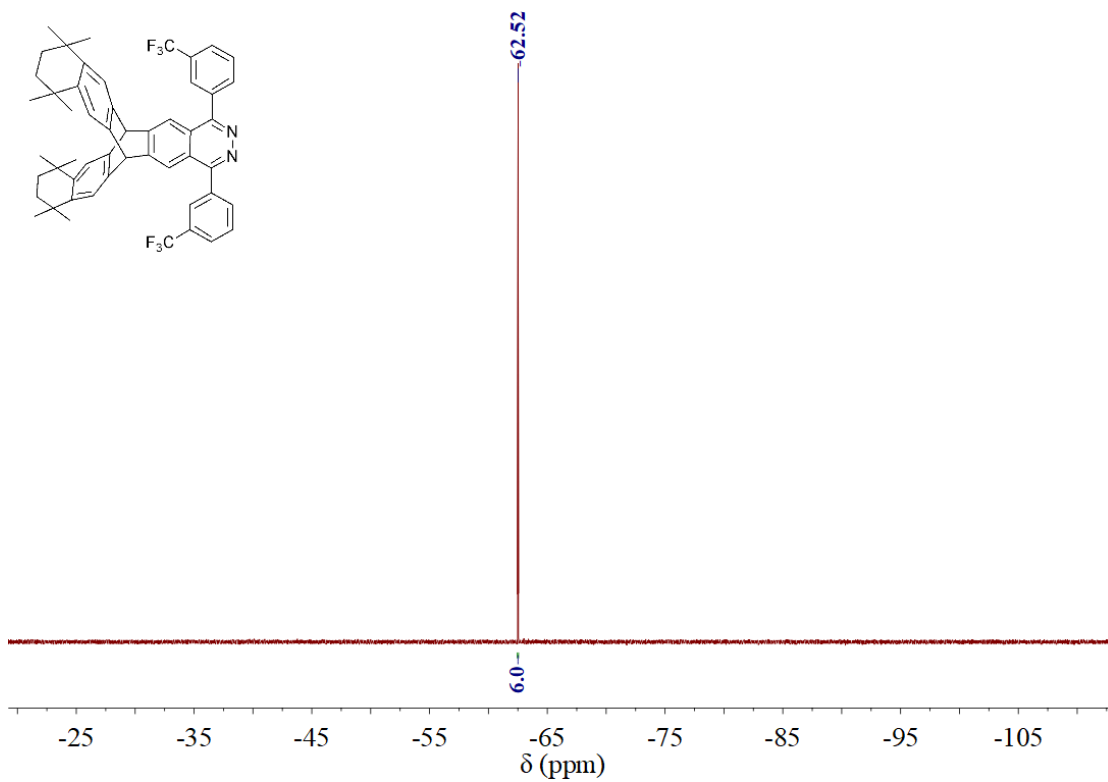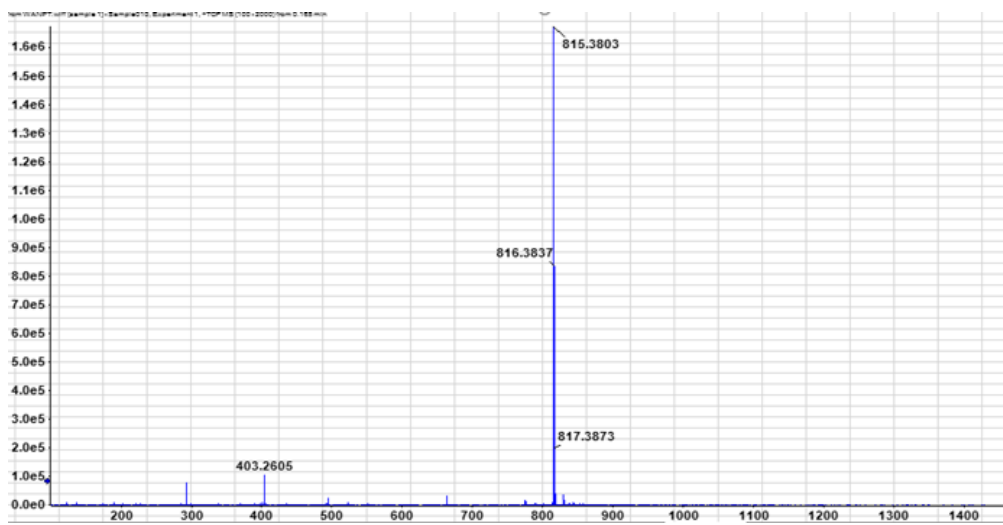

Ir1:

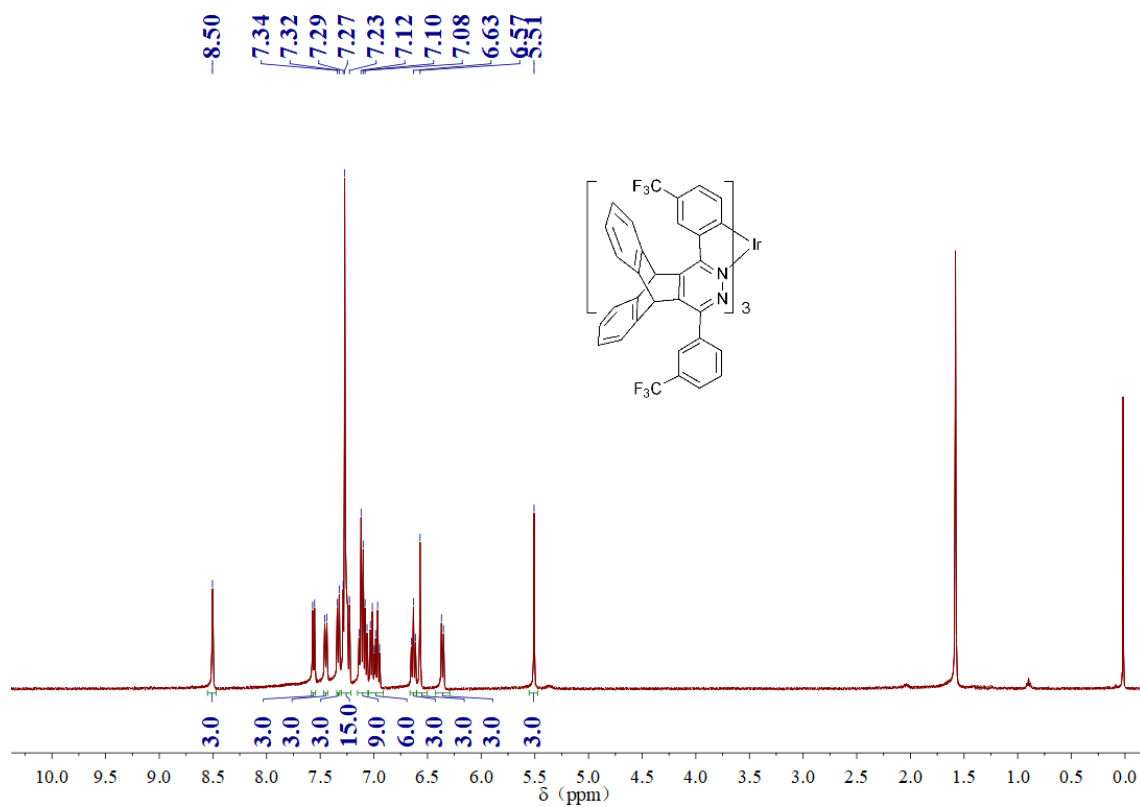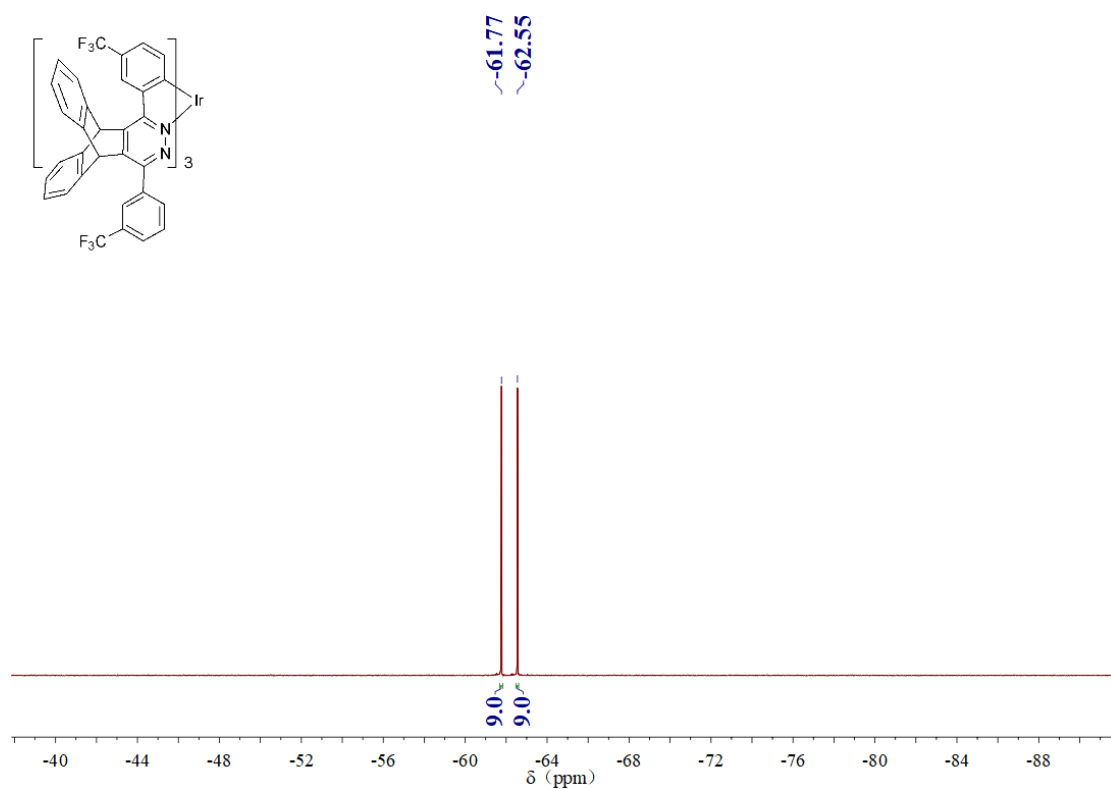

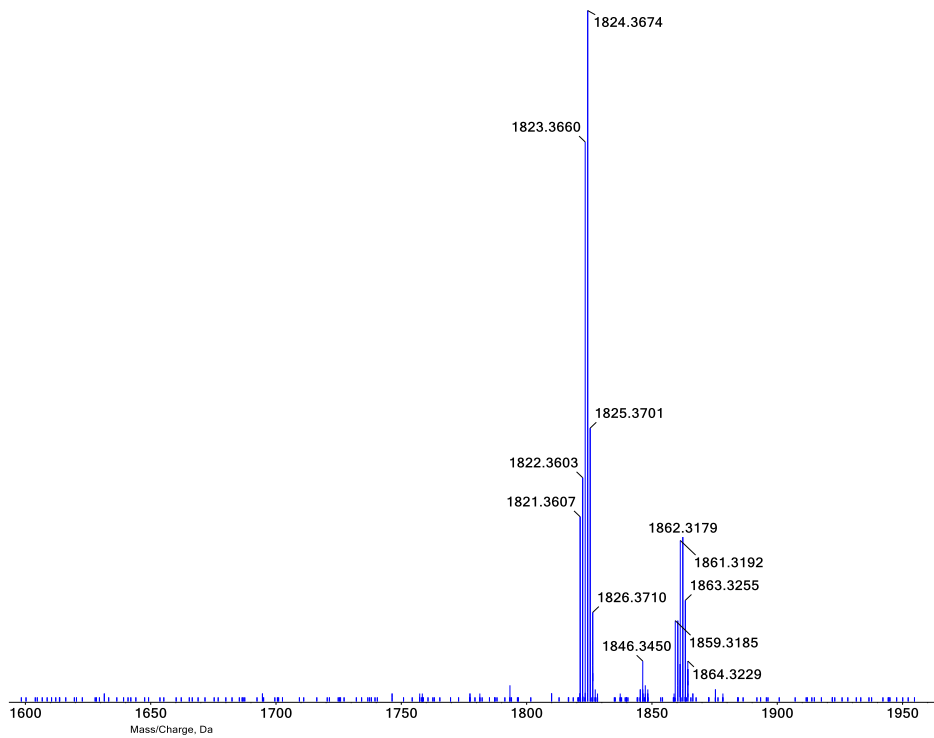

Ir2:

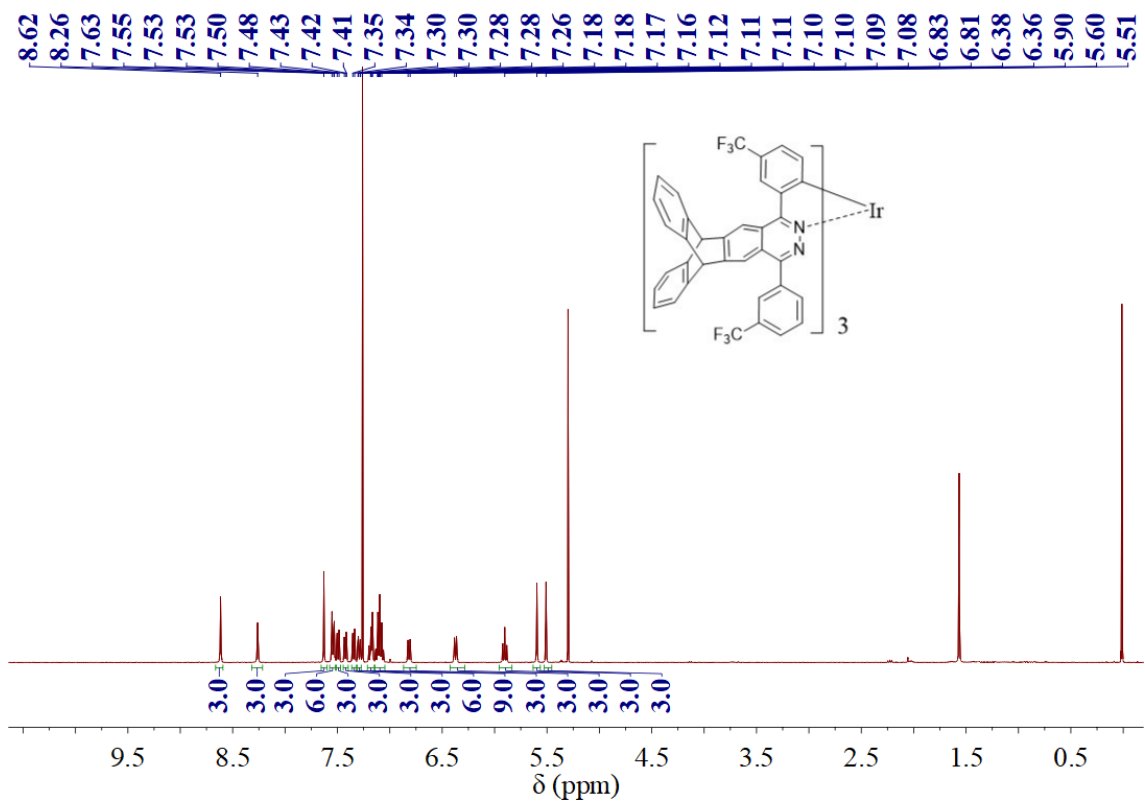

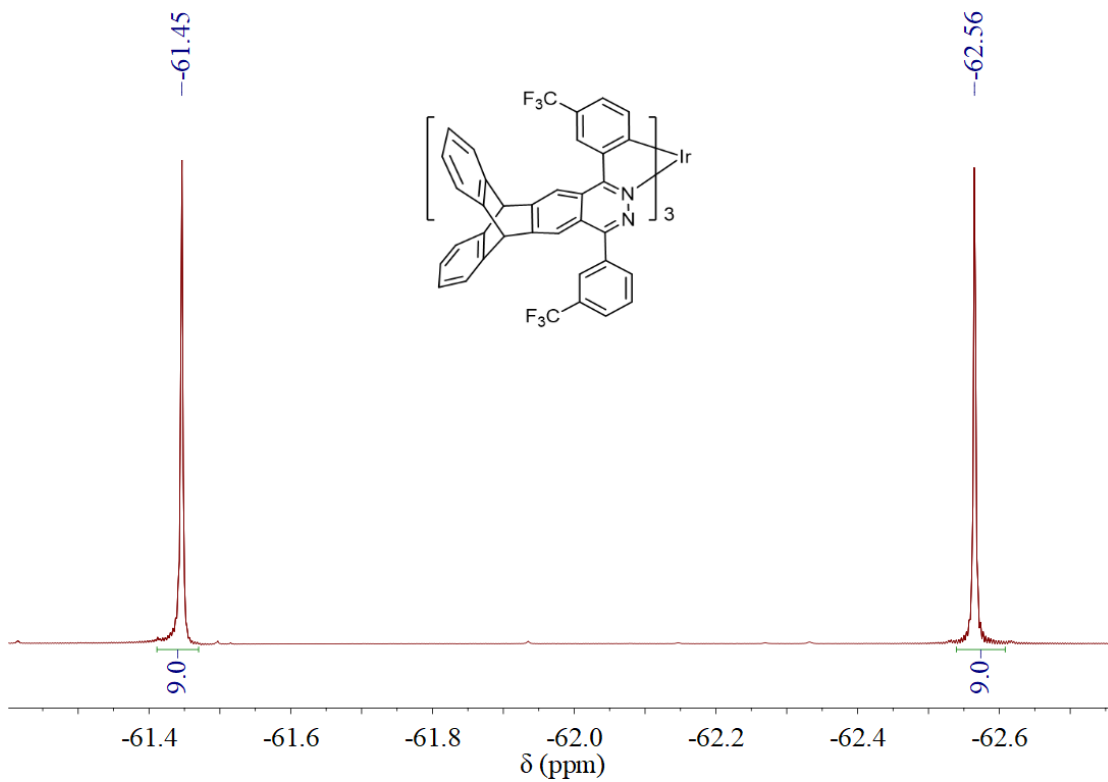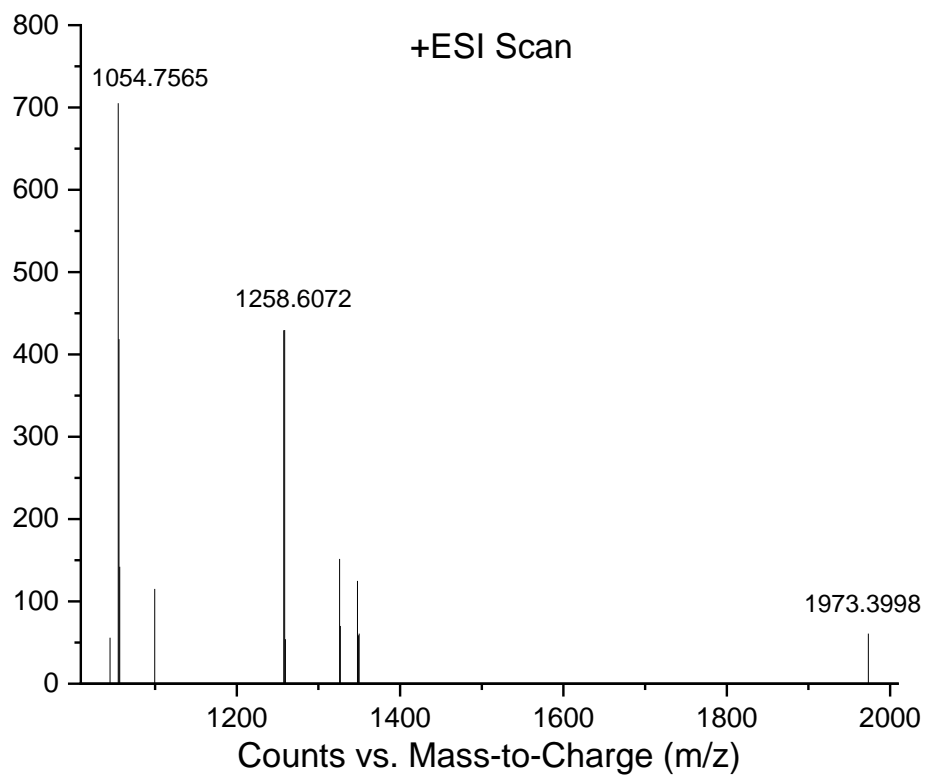

Ir3:

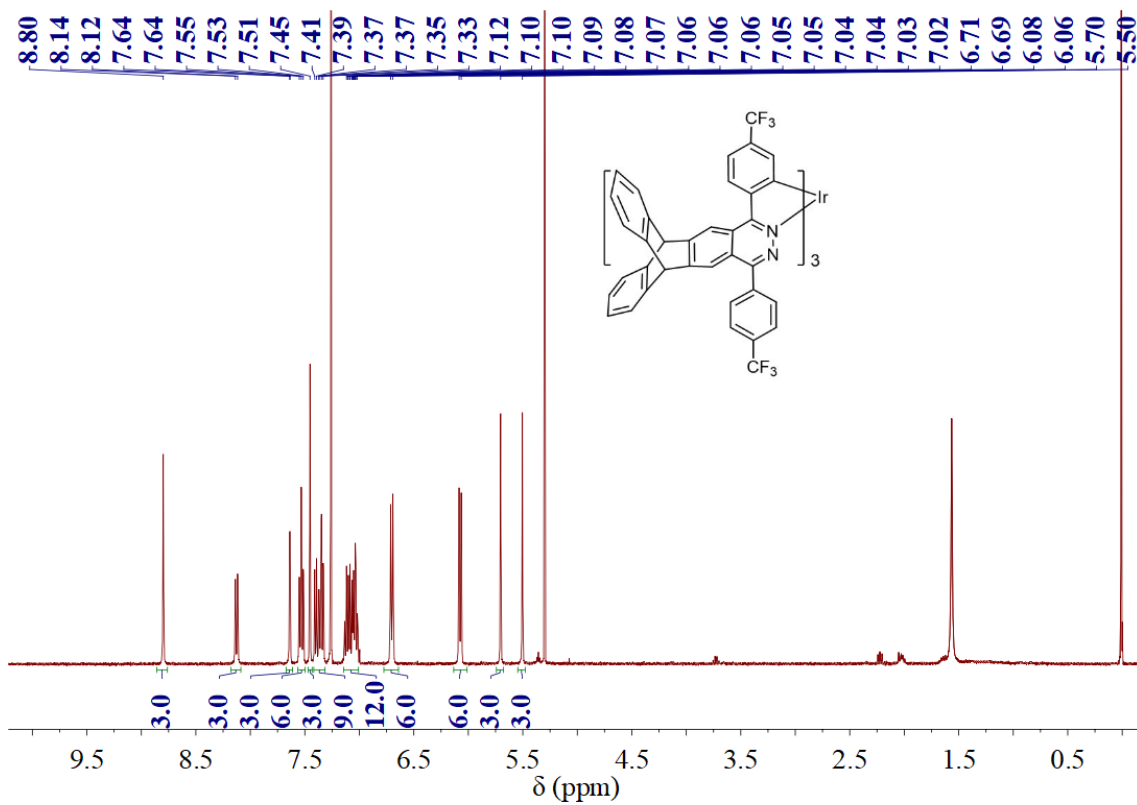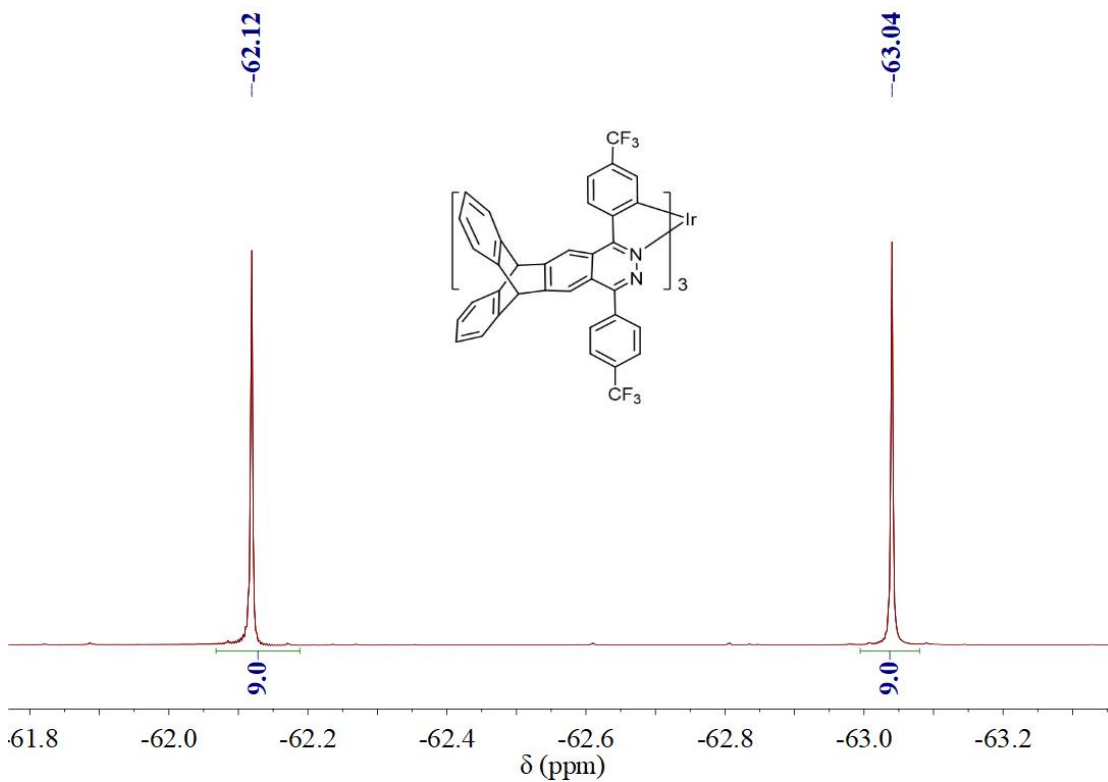

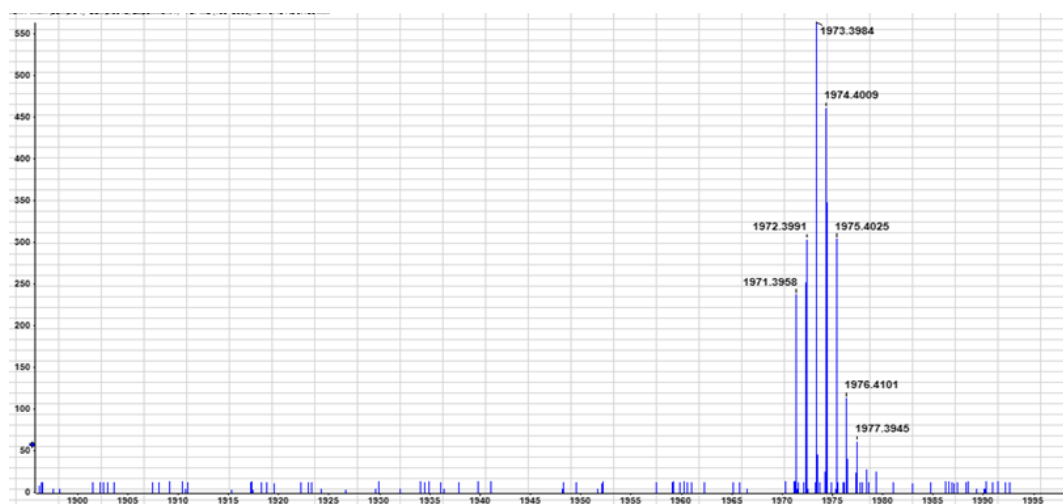

Ir4:

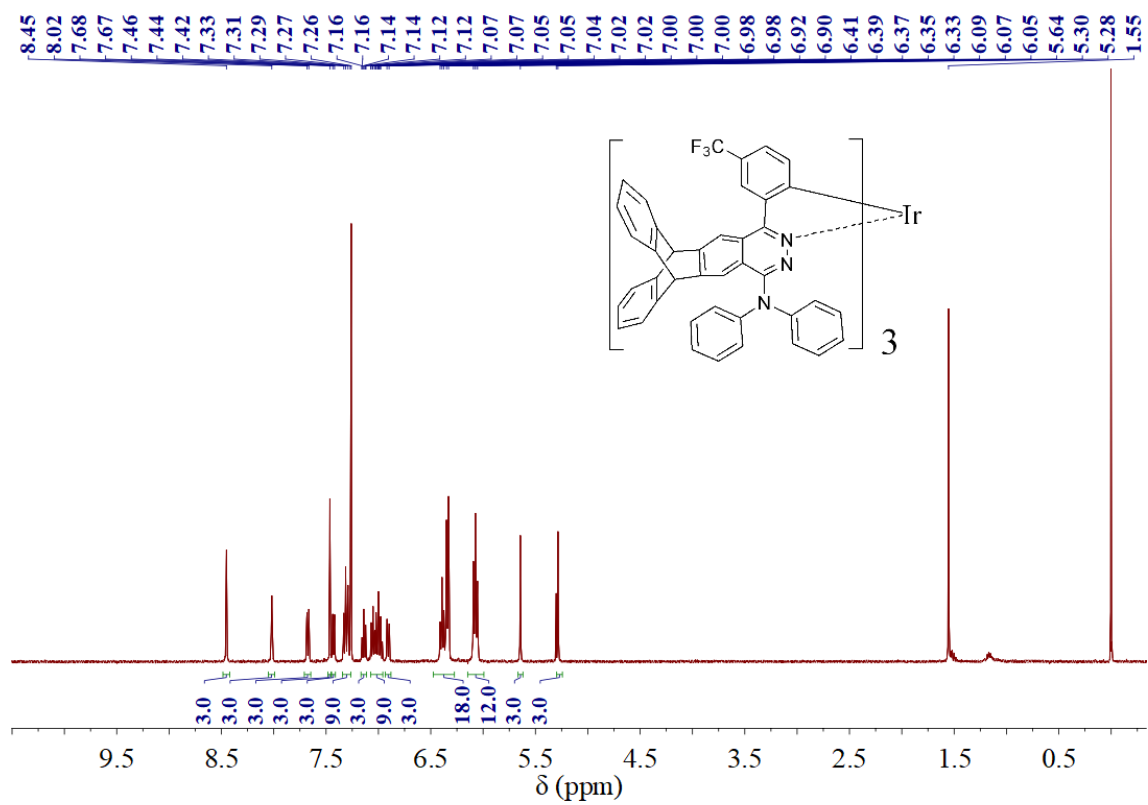

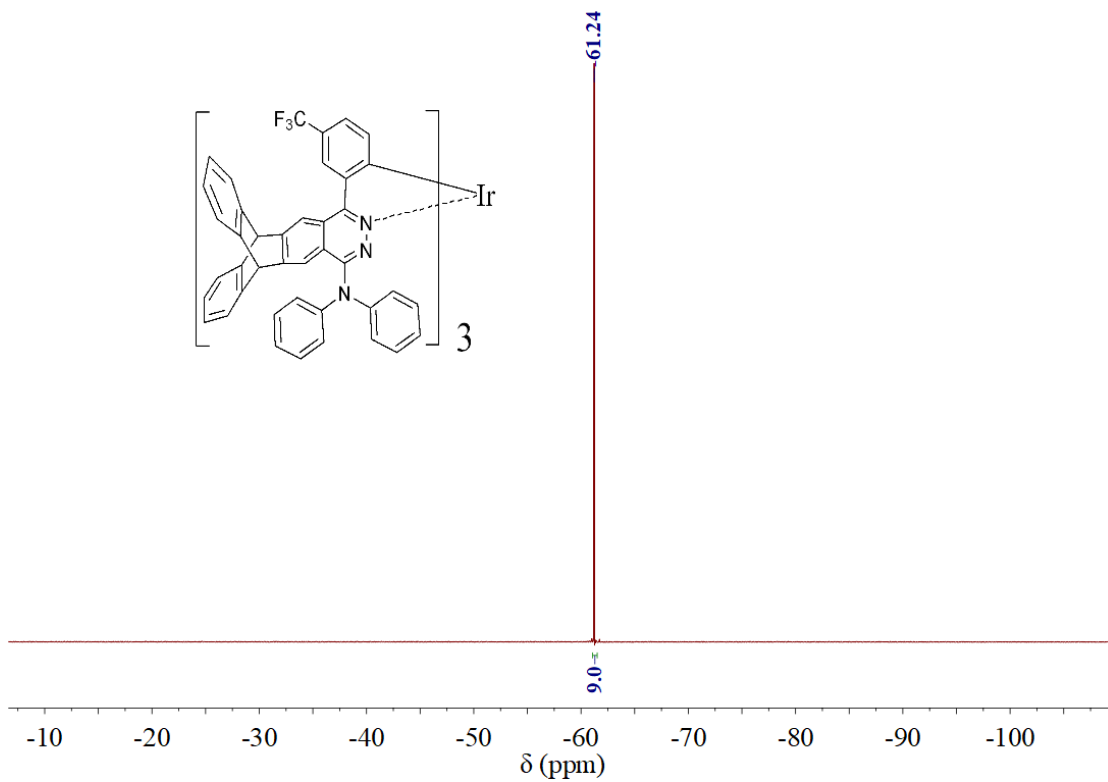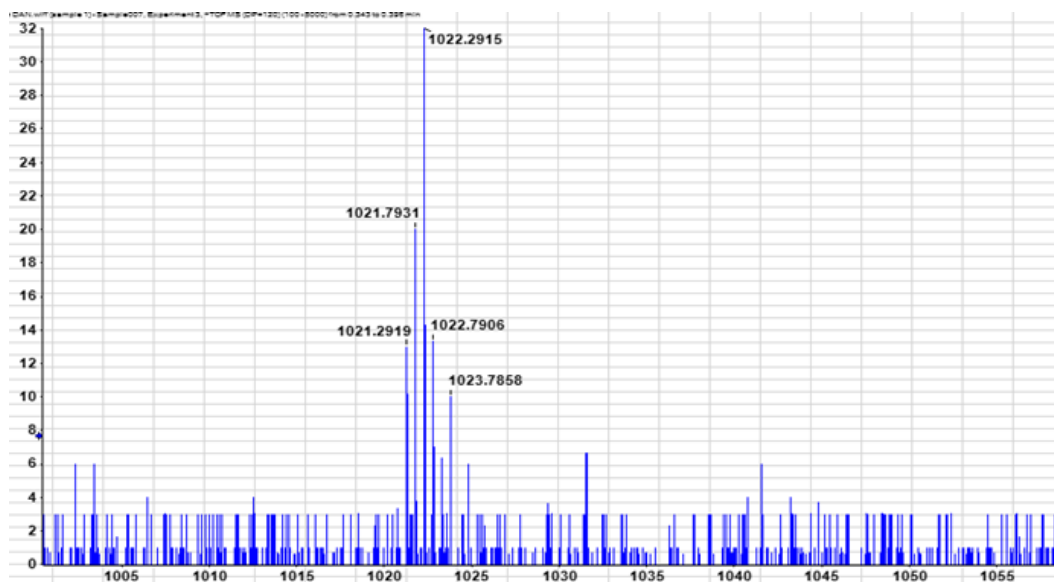

Ir5:

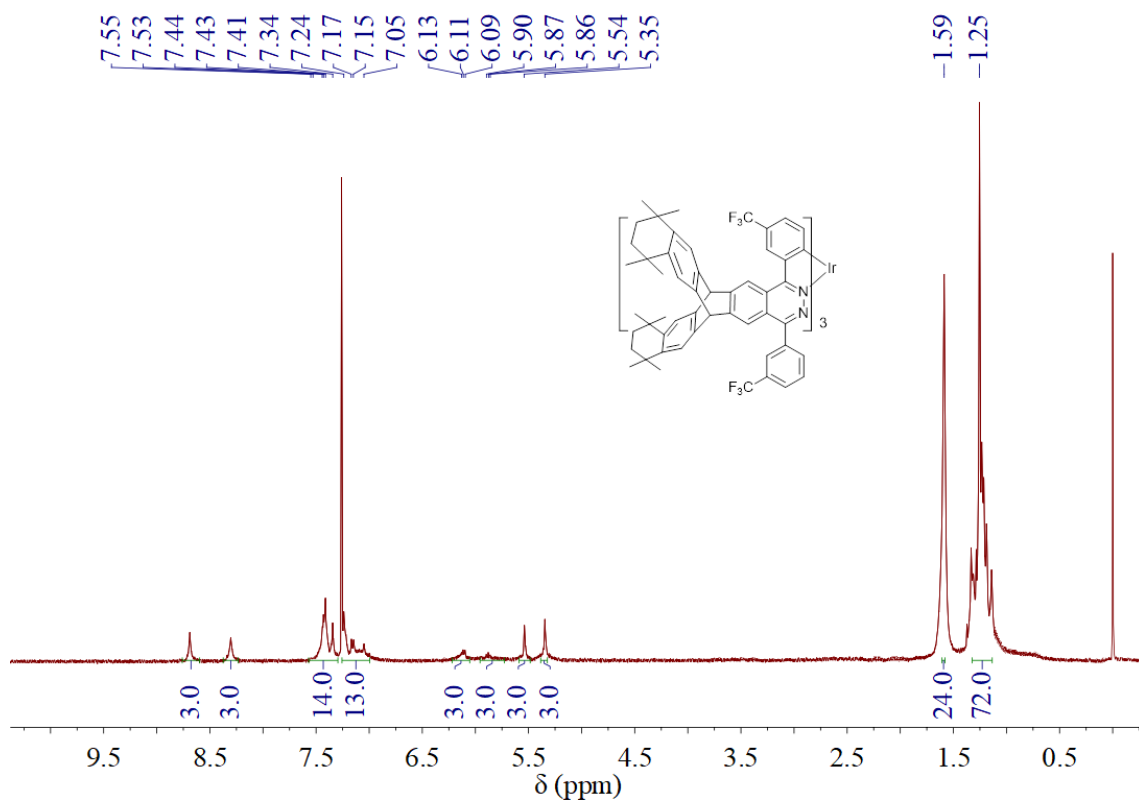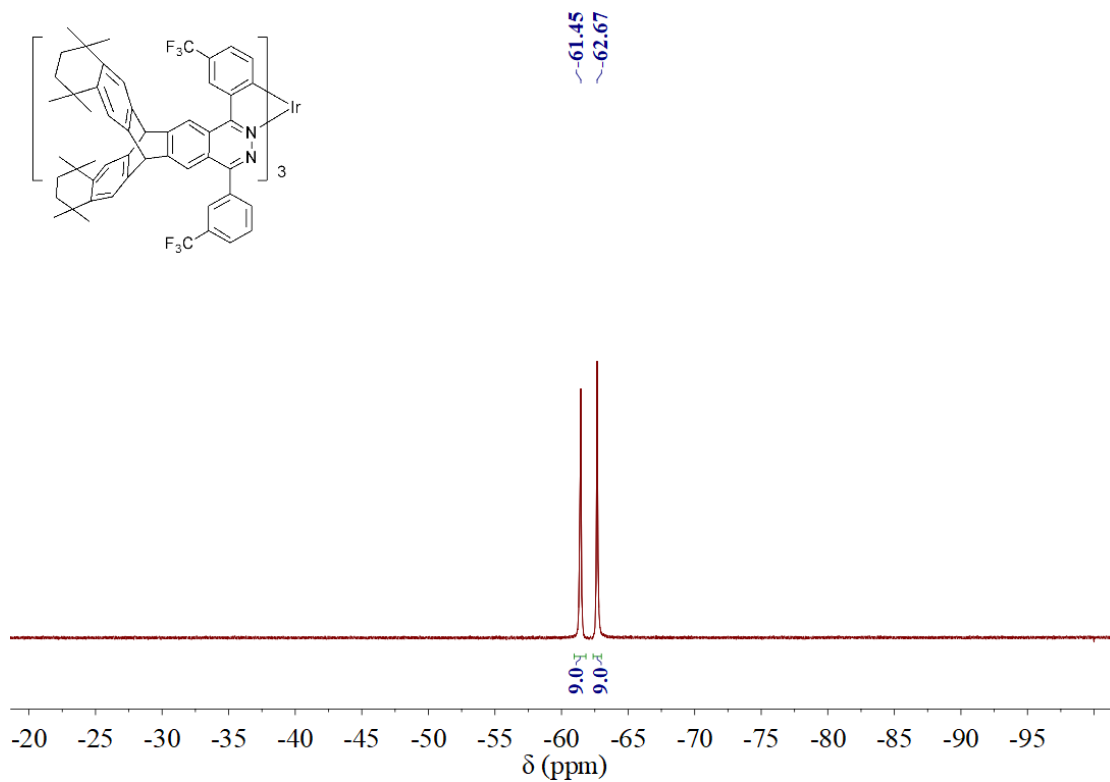



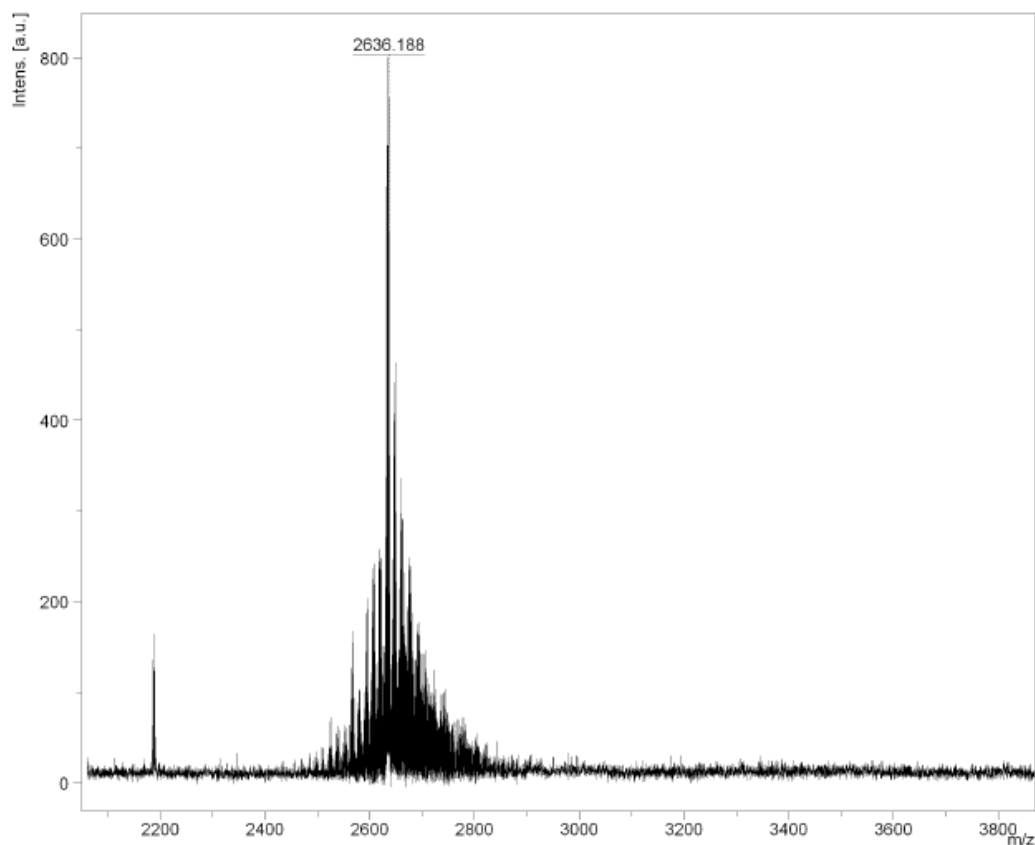

## 6. References

- [1] Becke AD. Density-functional thermochemistry. III. The role of exact exchange, *J Chem Phys*, 1993; 98: 5648–5652; b) Lee C, Yang W and Parr RG. Development of the Colic-Salvetti correlation-energy formula into a functional of the electron density. *Phys Rev B*, 1988; 37: 785–789.
- [2] Hay PJ and Wadt WRJ. Ab initio effective core potentials for molecular calculations. Potentials for the transition metal atoms Sc to Hg. *Chem Phys*, 1985; 82: 270–283; b) Wadt WR and Hay PJJ. Ab initio effective core potentials for molecular calculations. Potentials for main group elements Na to Bi. *Chem Phys*, 1985; 82: 284–298; c) Hay PJ and Wadt WR. Ab initio effective core potentials for molecular calculations. Potentials for K to Au including the outermost core orbitals. *J Chem Phys*, 1985; 82: 299–310.
- [3] Hariharan PC and Pople JA. Accuracy of AH  $n$  equilibrium geometries by single determinant molecular orbital theory. *Mol Phys*, 1974; 27: 209–214.
- [4] Lu T and Chen FW. Multiwfn: a multifunctional wavefunction analyzer. *J Comput Chem*, 2012;

33: 580–592.

[5] Humphrey W, Dalke A and Schulten K. VMD - visual molecular dynamics. *J Molec Graphics*, 1996; 14: 33–38.

[6] Frisch MJ, Trucks GW, Schlegel HB, Scuseria GE, Robb MA, Cheeseman JR, et al. *Gaussian 16*, Rev. B.01, Gaussian, Inc., Wallingford CT, 2016.
